# Supplementary material for: Metabolic remodeling in cardiac hypertrophy and heart failure with reduced ejection fraction occurs independent of transcription factor EB in mice
Source: PubMed Central journal article supplement (PMC10800928; doi:10.3389/fcvm.2023.1323760), 2024-01-08
Supplement: Datasheet1.pdf [file Datasheet1.pdf]

## Supplementary Material

### Metabolic remodeling in cardiac hypertrophy and heart failure with reduced ejection fraction occurs independent of transcription factor EB in mice

Niklas Dörmann, Elke Hammer, Karlotta Struckmann, Julia Rüdebusch, Kirsten Bartels, Kristin Wenzel, Julia Schulz, Stefan Gross, Stefan Schwanz, Elisa Martin, Britta Fielitz, Cristina Pablo Tortola, Alexander Hahn, Alexander Benkner, Uwe Völker, Stephan B. Felix, Jens Fielitz

## 1 Supplementary Figures and Tables

### 1.1 Supplementary Figures

**Supplementary Figure 1. TFE3-induced *Ppargc1a* expression is regulated by class IIa HDACs and PKD.** (A) Luciferase assays performed with cell extracts of COS-7 cells transfected with Hs\_*Ppargc1a*-Luc and increasing amounts of FLAG-TFEB (TFEB; 50, 100, 200, and 400 ng) as indicated or control (-) plasmid. Luciferase activity was normalized to expression of CMV-LacZ and expressed as fold increase. Data are represented as mean  $\pm$  SD. Two-tailed *t*-test; ###*p*<0.001 vs. control transfection with pcDNA3.1; \**p*<0.05, \*\**p*<0.01, \*\*\**p*<0.001 vs. transfection with TFEB only. (B-D) Luciferase assays performed with cell extracts of COS-7 cells transfected with Hs\_*Ppargc1a*-Luc, FLAG-TFEB (TFEB) and increasing amounts (50, 100, 200, and 400 ng) of MYC-HDAC4 (HDAC4), MYC-HDAC5 (HDAC5), or MYC-HDAC7 (HDAC7) as indicated or control (-) plasmid. Luciferase activity was normalized to expression of CMV-LacZ and expressed as fold increase. Data are represented as mean $\pm$ SD. One-way ANOVA *q*<0.0001 for (B); ###*q*<0.001 vs. control transfection with pcDNA3.1; \**q*<0.05; \*\**q*<0.01; \*\*\**q*<0.001 vs. transfection with TFEB only. (E-G), COS-7 cells were transfected with expression plasmids encoding FLAG-TFEB, (E) HDAC4-MYC, (F) HDAC5-MYC, or (G) HDAC7-MYC, or constitutively active (ca) PKD1 (left panel), caPKD2 (middle panel), and caPKD3 (right panel) proteins, as indicated, together with the Hs\_*Ppargc1a*-Luc reporter construct. Values were normalized to expression of CMV-LacZ and calculated as the fold increase in luciferase/CMV-LacZ ratio compared with the reporter alone. Data are represented as mean  $\pm$  SD. One-way ANOVA *q*<0.0001 for (E-G); \**q*<0.05; \*\**q*<0.01; \*\*\**q*<0.001. *n*=5.

**Supplementary Figure 2. Deletion of TFEB leads to an increased expression of cardiac stress and remodeling markers and a decreased cardiac function.** (A) Quantitative real-time polymerase chain reaction (qRT-PCR) analysis of *Tfeb*, *Tfe3* and *Mitf* expression from WT and cKO mice. mRNA expression was normalized to *Gapdh*. (B) Western blot analysis with anti-TFEB and anti-GAPDH antibodies (left; n.s.=nonspecific signal). GAPDH was used as loading control. Bar graph showing the ratio of the relative densities of TFEB and GAPDH protein contents. (C) Heart, lung and liver weights of WT and cKO mice normalized to tibia length. (D) Echocardiographic data for left ventricular ejection fraction (LVEF) and fractional shortening (FS) from WT and cKO mice. (E) Representative images of Hematoxylin and Eosin (H&E) stained heart cross-sections of WT and cKO mice. (F) Wheat Germ Agglutinin (WGA) stained histological cross-sections of hearts from WT and cKO mice (Scale bar, 100  $\mu$ m) and (G) myocyte cross-sectional area (MCSA) measured on WGA stained sections with Image J. (H) Quantitative real-time polymerase chain reaction (qRT-PCR) analysis of indicated genes from WT and cKO mice. mRNA expression was normalized to *Gapdh*. (I) Western blot analysis with anti- $\beta$ -MyHC and anti-GAPDH antibodies. GAPDH was used as loading control. Bar graph showing

the ratio of the relative densities of  $\beta$ -MyHC and GAPDH protein contents. **(J)** Representative images of Picrosirius Red stained (PSR, left) heart cross-sections of WT and cKO mice; scale bar, 1 mm. Fibrotic area (right) was measured with Image J. **(K)** qRT-PCR analysis of indicated genes from WT and cKO mice. mRNA expression was normalized to *Gapdh*. Data are presented as Mean $\pm$ SD (WT: n=10, cKO: n=8; \* $q$ <0.05, \*\* $q$ <0.01, \*\*\* $q$ <0.001, \*\*\*\* $q$ <0.0001).

**Supplementary Figure 3. Deletion of TFEF leads to an impaired regulation of genes involved in energy homeostasis.** Quantitative real-time polymerase chain reaction (qRT-PCR) analysis of indicated metabolic genes **(A-B)** and genes involved in OXPHOS **(C)** and mitochondrial fission and fusion **(D)** from WT and cKO mice. mRNA expression was normalized to *Gapdh*. **(E)** Representative images of PAS stained heart cross-sections of WT and cKO mice; left: overview, scale bar 1mm; middle: higher magnification, scale bar 100  $\mu$ m (corresponding to inset from left), right: quantification of glycogen content with Image J. **(A-E)** Data are presented as mean  $\pm$  SD (WT: n=10, cKO: n=8; \* $q$ <0.05, \*\* $q$ <0.01, \*\*\* $q$ <0.001, \*\*\*\* $q$ <0.0001). **(F)** Volcano plots of differentially expressed genes in WT and cKO hearts. Genes that are significantly upregulated (red,  $q$ -value < 0.05), downregulated (blue,  $q$ -value < 0.05) or unchanged (gray, not significant (n.s.)) are indicated. The grid line on the y axis indicates the significant threshold of  $-\log_{10}(q\text{-value}) = 1.3$ .

**Supplementary Figure 4. PO-induced cardiomyocyte hypertrophy is comparable between WT and cKO mice in the LVH model.** **(A)** Quantitative real-time polymerase chain reaction (qRT-PCR) analysis of MiT/TFE genes in hearts of WT and cKO mice after 21 days of Sham or TAC surgery as indicated. mRNA expression was normalized to *Gapdh*. **(B)** Kinetics of left ventricular mass as determined by echocardiography at indicated time points after Sham and TAC surgery, respectively, of WT and cKO mice. **(C)** Representative images of Hematoxylin and Eosin (H&E) stained cardiac cross-sections of WT and cKO mice; scale bar, 100  $\mu$ m. **(D-G)** Frequency-distribution histograms of myocyte cross-sectional areas (MCSA) measured with Image J on Wheat Germ Agglutinin (WGA) stained sections comparing WT\_Sham and WT\_TAC **(D)**, cKO\_Sham and cKO\_TAC **(E)**, WT\_Sham and cKO\_Sham **(F)**, and WT\_TAC and cKO\_TAC **(G)**. Data are presented as mean  $\pm$  SD (21 days, WT Sham: n=10, WT TAC: n=13, cKO Sham: n=10, cKO TAC: n=15; \* $q$ <0.05, \*\* $q$ <0.01, \*\*\* $q$ <0.001, \*\*\*\* $q$ <0.0001).

**Supplementary Figure 5. PO-induced cardiomyocyte hypertrophy is attenuated in cKO mice in the HFrEF model.** **(A)** Quantitative real-time polymerase chain reaction (qRT-PCR) analysis of MiT/TFE genes in hearts of WT and cKO mice after 56 days of Sham or TAC surgery as indicated. mRNA expression was normalized to *Gapdh*. **(B)** Kinetics of left ventricular mass as determined by echocardiography at indicated time points after Sham and TAC surgery, respectively, of WT and cKO mice. **(C)** Representative images of Hematoxylin and Eosin (H&E) stained cardiac cross-sections of WT and cKO mice; scale bar, 100  $\mu$ m. **(D-G)** Frequency-distribution histograms of myocyte cross-sectional areas (MCSA) measured with Image J on Wheat Germ Agglutinin (WGA) stained sections comparing WT\_Sham and WT\_TAC **(D)**, cKO\_Sham and cKO\_TAC **(E)**, WT\_Sham and cKO\_Sham **(F)**, and WT\_TAC and cKO\_TAC **(G)**. Data are presented as mean  $\pm$  SD (56 days, WT Sham: n=10, WT TAC: n=6, cKO Sham: n=8, cKO TAC, n=6; \* $q$ <0.05, \*\* $q$ <0.01, \*\*\* $q$ <0.001, \*\*\*\* $q$ <0.0001).

**Supplementary Figure 6. Proteomics data of WT and cKO mice after 56 days of Sham or TAC surgery.** **(A)** Correlation between the cKO\_TAC/cKO\_Sham, **(B)** cKO\_TAC/WT\_TAC and **(C)** cKO\_Sham/WT\_Sham ratios and the WT\_TAC/WT\_Sham ratios. Ratio data is presented as single points. Correlation was calculated with Pearson r and p value. Simple linear regression is shown with 95% CI. Single protein analysis of **(D)** cardiac stress and remodeling markers and **(E)** proteins of the

energy metabolism, mitochondrial fission and fusion, and ETC. (56 days, WT Sham: n=10, WT TAC: n=6, cKO Sham: n=8, cKO TAC: n=6; \* $q < 0.05$ , \*\* $q < 0.01$ , \*\*\* $q < 0.001$ , \*\*\*\* $q < 0.0001$ ).

**Supplementary Figure 7. Analysis of proteomics data from hearts of WT and cKO mice after 56 days of Sham or TAC surgery.** (A) Heatmaps of canonical metabolic pathways and (B) canonical signaling pathways with significant enrichment of regulated proteins are shown. Data are presented as heat maps ( $q$ -value  $\leq 0.05$ , FC=1.3). Hatched marked boxes indicate that changes are not significant. (C) KEGG pathway of FAO related proteins (highlighted in red arrows) as shown in A.

**1.2 Supplementary Tables****Supplementary Table 1: PCR primers for genotyping.**

| <b>Name</b>                               | <b>Primer sequence</b>    |
|-------------------------------------------|---------------------------|
| <b>Tcf<sub>eb</sub>_forward</b>           | GTAGAACTGAGTCAAGGCATACTGG |
| <b>Tcf<sub>eb</sub>_reverse</b>           | GGGTCCTACCTACCACAGAGCC    |
| <b><math>\alpha</math>MHC-Cre_forward</b> | CGGCACTCTTAGCAAACCTC      |
| <b><math>\alpha</math>MHC-Cre_reverse</b> | AGGCAAATTTTGGTGTACGG      |

**Supplementary Table 2: qRT-PCR primers.**

| <b>Name</b>     | <b>Primer sequence</b>    |
|-----------------|---------------------------|
| Acta1_forward   | AGCCGGTGCTCTCCTACTG       |
| Acta1_reverse   | CGTCGCACATGGTGTCTAGT      |
| Atp5a1_forward  | CGGGCTGAGGAATGTTCA        |
| Atp5a1_reverse  | CCAAGTTCAGGGACATACCC      |
| Colla1_forward  | TGTAAACACCCCAGCGAAGAA     |
| Colla1_reverse  | CTGAGTTGCCATTTCTTGGGA     |
| Col3a1_forward  | CTCACCTTCTTCATCCCCTCTTA   |
| Col3a1_reverse  | ACATGGTTCTGGCTTCCAGACAT   |
| Cox4_forward    | TCACTGCGCTCGTTCTGAT       |
| Cox4_reverse    | CGATCGAAAGTATGAGGGATG     |
| Cpt1b_forward   | GAGTGACTGGTGGGAAGAATATG   |
| Cpt1b_reverse   | GCTGCTTGCACATTTGTGTT      |
| Drp1_forward    | TCCCAATTCCATTATCCTCGC     |
| Drp1_reverse    | CATCAGTACCCGCATCCATG      |
| Esrra_forward   | GCCTCCAATGAGTGTGAGATC     |
| Esrra_reverse   | TTTGTACTTCTGCCGTCGG       |
| Esrrb_forward   | TGTGTTCCCTCATCAACTGGG     |
| Esrrb_reverse   | CAGCTTGTCATCGTATGGGAG     |
| Esrrg_forward   | GGATGGGCAAACATATTCCAG     |
| Esrrg_reverse   | GTTTCATCCTCAAACGAAAGCG    |
| Fis1_forward    | AAGGGAGCAAAGAGGAACAG      |
| Fis1_reverse    | GCCCTCGCACATACTTTAGAG     |
| Gys1_forward    | CTGTCCTGTTCGGCTTCCT       |
| Gys1_reverse    | CCACATACGGCTTCTCTTCG      |
| Hk2_forward     | GCCAGCCTCTCCTGATTTTAGTGT  |
| Hk2_reverse     | GGGAACACAAAAGACCTCTTCTGG  |
| Mfn1_forward    | CATTGCGTTTCGGTTTTCCC      |
| Mfn1_reverse    | GAAGGAGCAGTAGGAGTTGAAG    |
| Mfn2_forward    | CGAGGCTCTGGATTCCTTC       |
| Mfn2_reverse    | CAACCAGCCAGCTTTATTCC      |
| Mitf_forward    | AAAAGTCAACCTCTGAAGAGCAG   |
| Mitf_reverse    | GCGTAGCAAGATGCGTGAT       |
| MT-Co1_forward  | TCCACTATTTGTCTGATCCGTA    |
| MT-Co1_reverse  | AGTAGTATAGTAATGCCTGCGGCTA |
| MT-Cytb_forward | CATTTATTATCGCGGCCCTA      |
| MT-Cytb_reverse | TGGGTTGTTTGATCCTGTTTC     |
| MT-Nd1_forward  | CTAGCAGAAACAAACCGGGC      |
| MT-Nd1_reverse  | CCGGCTGCGTATTCTACGTT      |
| MT-Nd4_forward  | CCAAACTCCATGAAGCTTCATAGG  |

|                   |                          |
|-------------------|--------------------------|
| MT-Nd4_reverse    | GATGATGTGAGGCCATGTGCG    |
| Myh6_forward      | GCCAAGACTGTCCGGAATGA     |
| Myh6_reverse      | TGGAAGATCACCCGGGACTT     |
| Myh7_forward      | CGCATCAAGGAGCTCACC       |
| Myh7_reverse      | CTGCAGCCGCAGTAGGTT       |
| Ndufb8_forward    | TCCCTTCCTACCAGCCTGT      |
| Ndufb8_reverse    | GAGCAGGAAAACAGGAATGC     |
| Nppa_forward      | GGGGGTAGGATTGACAGGAT     |
| Nppa_reverse      | ACACACCACAAGGGCTTAGG     |
| Nppb_forward      | GCACAAGATAGACCGGATCG     |
| Nppb_reverse      | CTTCAAAGGTGGTCCCAGAG     |
| Nrf1_forward      | TGGAGTCCAAGATGCTAATGG    |
| Nrf1_reverse      | GCGAGGCTGGTTACCACA       |
| Ppara_forward     | CTGAGACCCTCGGGGAAC       |
| Ppara_reverse     | AAACGTCAGTTCACAGGGAAG    |
| Ppargc1a_forward  | TGAAAGGGCCAAACAGAGAG     |
| Ppargc1a_reverse  | GTAAATCACACGGCGCTCTT     |
| Pppargc1b_forward | CCACAGCCCCTTCCAGA        |
| Pppargc1b_reverse | CCAAGAGAGTCGCTTTGTGA     |
| Sdha_forward      | CCCTGAGCATTGCAGAATC      |
| Sdha_reverse      | TCTTCTCCAGCATTTGCCTTA    |
| Sdhb_forward      | ACTGGTGGAAACGGAGACAAG    |
| Sdhb_reverse      | CCTCTGTGAAGTCGTCTCTGG    |
| Slc2a1_forward    | TTGTTGTAGAGCGAGCTGGA     |
| Slc2a1_reverse    | TTCAAAGAAGGCCACAAAGC     |
| Slc2a4_forward    | GTCGGGTTTCCAGCAGAT       |
| Slc2a4_reverse    | GGCATTGATAACCCCAATGT     |
| Tfam_forward      | CAAAGGATGATTCGGCTCAG     |
| Tfam_reverse      | AAGCTGAATATATGCCTGCTTTTC |
| Tfeb_forward      | GAGCTGGGAATGCTGATCC      |
| Tfeb_reverse      | CTTGAGGATGGTGCCTTTGT     |
| Tfe3_forward      | GCTCAAAGCCAACCCCTAT      |
| Tfe3_reverse      | GGTGTGGCCTGCAGTGATA      |
| Uqcrc2_forward    | TGGGCTCTTTGGAATTTACAC    |
| Uqcrc2_reverse    | TTGGTTGTAGGCAGCATTGA     |

---

**Supplementary Table 3: LC-MS/MS parameters (A) and Spectronaut parameters for peptide/Protein identification and intensity extraction (B).**

**Supplementary Table 3A: LC-MS/MS parameters (data independent mode; quantitative data).**

| <b>Data independent acquisition (DIA)</b>      |                                                                                                                                        |
|------------------------------------------------|----------------------------------------------------------------------------------------------------------------------------------------|
| <b>Reversed phase liquid chromatography</b>    | <b>Ultimate 3000 RSLC (Thermo Scientific)</b>                                                                                          |
| Trap column                                    | 75 $\mu$ m inner diameter, packed with 3 $\mu$ m C18 particles (Acclaim PepMap100, Thermo Scientific)                                  |
| Analytical column                              | 75 $\mu$ m inner diameter, packed with 2.6 $\mu$ m C18 particles (Accucore, 25 cm, Thermo Scientific)                                  |
| Flow rate                                      | 300 nl/min                                                                                                                             |
| Column oven temperature                        | 40°C                                                                                                                                   |
| Buffer system                                  | binary buffer system consisting of 0.1% acetic acid in HPLC-grade water (buffer A) and 100% ACN in 0.1% acetic acid (buffer B)         |
| Gradient                                       | gradient of buffer B: 2min 2% to 5%, 8min 7%, 60min 7% to 25%, 5min 25 to 40%, 2 min 40% to 90%, 6 min 90%, 2 min 90% to 2%, 10 min 2% |
| <b>Mass spectrometer</b>                       | Exploris 480                                                                                                                           |
| Operation mode                                 | Data-independent                                                                                                                       |
| Electrospray                                   | Nanospray Flex Ion Source                                                                                                              |
| <b>Full MS</b>                                 |                                                                                                                                        |
| MS scan resolution                             | 120,000                                                                                                                                |
| Normalized AGC target                          | 300%                                                                                                                                   |
| Maximum ion injection time for the MS scan     | 60 ms                                                                                                                                  |
| Scan range                                     | 350 to 1,200 m/z                                                                                                                       |
| Spectra data type                              | profile                                                                                                                                |
| <b>dd-MS2</b>                                  |                                                                                                                                        |
| Resolution                                     | 30,000                                                                                                                                 |
| Normalized MS/MS AGC target                    | 3,000                                                                                                                                  |
| Maximum ion injection time for the MS/MS scans | auto                                                                                                                                   |
| Spectra data type                              | profile                                                                                                                                |
| Selection for MS/MS                            | 1                                                                                                                                      |
| Isolation window                               | 65 windows m/z 13 (overlap m/z 2)                                                                                                      |
| Fixed first mass                               | 200                                                                                                                                    |
| Dissociation mode                              | higher energy collisional dissociation (HCD)                                                                                           |
| Normalized collision energy                    | fixed, 30                                                                                                                              |
| Dissociation mode                              | HCD                                                                                                                                    |

**Supplementary Table 3B: Spectronaut parameters for peptide/Protein identification and intensity extraction.**

---

**Spectronaut 14.10**

---

Computer Name: AGVOE-SPECTRONA

User Domain Name: AGVOE-SPECTRONA

User Name: spectronaut

Analysis Mode: UI

Analysis Type: directDIA

Analysis Date: 20-April-2021

Settings Used:

**Pulsar Search\Peptides**

Toggle N-terminal M: True

Min Peptide Length: 7

Max Peptide Length: 52

Missed Cleavages: 2

Digest Type: Specific

Enzymes / Cleavage Rules: Trypsin/P

**Pulsar Search\Labeling**Channels:

Channel 1: False

Channel 2: False

Channel 3: False

**DIA Analysis\Data Extraction**

MS1 Mass Tolerance Strategy: Dynamic

Correction Factor: 1

MS2 Mass Tolerance Strategy: Dynamic

Correction Factor: 1

Intensity Extraction MS1: Maximum Intensity

Intensity Extraction MS2: Maximum Intensity

**DIA Analysis\XIC Extraction**

XIC IM Extraction Window: Dynamic

Correction Factor: 1

XIC RT Extraction Window: Dynamic

Correction Factor: 1

**Pulsar Search\Modifications**

Max Variable Modifications: 5

**Database**

Original File: Uniprot\_2\_2021.fasta (Mus musculus)

**Select Modifications:**

Fixed Modifications: Carbamidomethyl (C)

Variable Modifications: Acetyl (Protein N-term), Oxidation (M)



**DIA Analysis\Calibration**

MS1 Mass Tolerance Strategy: System Default  
MS2 Mass Tolerance Strategy: System Default  
Precision iRT: True  
iRT <-> RT Regression Type: Local (Non-Linear) Regression  
Exclude Deamidated Peptides: True  
MZ Extraction Strategy: Maximum Intensity  
Allow source specific iRT Calibration: True

**DIA Analysis\Identification**

Generate Decoys: True  
Decoy Limit Strategy: Dynamic  
Library Size Fraction: 0.1  
Decoy Method: Mutated  
Preferred Fragment Source: NN Predicted Fragments  
Machine Learning: Per Run  
Exclude Duplicate Assays: True  
Precursor PEP Cutoff: 1  
Protein Qvalue Cutoff (Experiment): 0.01  
Protein Qvalue Cutoff (Run): 0.05  
Exclude Single Hit Proteins: False  
Pvalue Estimator: Kernel Density Estimator  
Precursor Qvalue Cutoff: 0.001  
Single Hit Definition: By Stripped Sequence

**DIA Analysis\Quantification**

Interference Correction: True  
MS1 Min: 2  
MS2 Min: 3  
Exclude All Multi-Channel Interferences: True  
Only Identified Peptides: True  
Protein LFQ Method: Automatic  
Major (Protein) Grouping: by Protein Group Id  
Minor (Peptide) Grouping: by Stripped Sequence  
Minor Group Top N: False  
Minor Group Quantity: Sum precursor quantity  
Major Group Top N: True  
Min: 2  
Max: 3  
Major Group Quantity: Mean peptide quantity  
Quantity MS-Level: MS2  
Quantity Type: Area  
Proteotypicity Filter: None  
Data Filtering: Qvalue percentile  
Fraction: 0.25  
Imputing Strategy: No Imputing

|                                              |                                         |
|----------------------------------------------|-----------------------------------------|
| Cross Run Normalization:                     | False                                   |
| <b><u>DIA Analysis\PTM Workflow</u></b>      |                                         |
| PTM Localization:                            | True                                    |
| Probability Cutoff:                          | 0.75                                    |
| PTM Analysis:                                | True                                    |
| Multiplicity:                                | True                                    |
| Run Clustering:                              | False                                   |
| PTM Consolidation:                           | Sum                                     |
| Flanking Region:                             | 7                                       |
| <b><u>DIA Analysis\Workflow</u></b>          |                                         |
| MS2 DeMultiplexing:                          | Automatic                               |
| Run Limit for directDIA Library:             | -1                                      |
| Method Evaluation:                           | False                                   |
| Profiling Strategy:                          | iRT Profiling                           |
| Profiling Row Selection:                     | Minimum Qvalue Row Selection            |
| Qvalue Threshold:                            | 0.001                                   |
| Profiling Target Selection:                  | Profile only non-identified Precursor   |
| Identification Criterion:                    | Qvalue                                  |
| Threshold:                                   | 0.001                                   |
| Carry-over exact Peak Boundaries:            | False                                   |
| Unify Peptide Peaks Strategy:                | Select corresponding Peak               |
| <b><u>DIA Analysis\Protein Inference</u></b> |                                         |
| Protein Inference Workflow:                  | Automatic                               |
| Inference Algorithm:                         | IDPicker                                |
| <b><u>DIA Analysis\Post Analysis</u></b>     |                                         |
| Calculate Sample Correlation Matrix:         | True                                    |
| Calculate Explained TIC:                     | Quick                                   |
| Differential Abundance Grouping:             | Major Group (Quantification Settings)   |
| Smallest Quantitative Unit:                  | Precursor Ion (Quantification Settings) |
| Use All MS-Level Quantities:                 | False                                   |
| Differential Abundance Testing:              | Paired <i>t</i> -test                   |
| Group-Wise Testing Correction:               | False                                   |
| Run Clustering:                              | True                                    |
| Distance Metric:                             | Manhattan Distance                      |
| Linkage Strategy:                            | Ward's Method                           |
| Z-score transformation:                      | False                                   |
| Order Runs by Clustering:                    | True                                    |
| <b><u>DIA Analysis\Pipeline Mode</u></b>     |                                         |
| <b><u>Post Analysis Reports:</u></b>         |                                         |
| Scoring Histograms:                          | True                                    |
| Data Completeness Bar Chart:                 | True                                    |
| Run Identifications Bar Chart:               | True                                    |
| CV Density Line Chart:                       | True                                    |

|                         |                            |
|-------------------------|----------------------------|
| CVs Below X Bar Chart:  | True                       |
| Generate SNE File:      | True                       |
| Store Iontraces in SNE: | False                      |
| Report Schema:          | C_FunGene_complex (Normal) |
| Reporting Unit:         | Across Experiment          |

**Pulsar Search\Identification**

|                    |      |
|--------------------|------|
| Peptide FDR:       | 0.01 |
| Protein Group FDR: | 0.01 |
| PSM FDR:           | 0.01 |

**Pulsar Search\Tolerances**

Tolerance Parameters:

|                        |         |
|------------------------|---------|
| Thermo Orbitrap:       |         |
| Calibration Search:    | Dynamic |
| MS1 Correction Factor: | 1       |
| MS2 Correction Factor: | 1       |
| Main Search:           | Dynamic |
| MS1 Correction Factor: | 1       |
| MS2 Correction Factor: | 1       |

TOF:

|                        |         |
|------------------------|---------|
| Calibration Search:    | Dynamic |
| MS1 Correction Factor: | 1       |
| MS2 Correction Factor: | 1       |
| Main Search:           | Dynamic |
| MS1 Correction Factor: | 1       |
| MS2 Correction Factor: | 1       |

Thermo IonTrap:

|                        |         |
|------------------------|---------|
| Calibration Search:    | Dynamic |
| MS1 Correction Factor: | 1       |
| MS2 Correction Factor: | 1       |
| Main Search:           | Dynamic |
| MS1 Correction Factor: | 1       |
| MS2 Correction Factor: | 1       |

**Pulsar Search\Workflow**

|                                      |                 |
|--------------------------------------|-----------------|
| Use DNN Predicted Ion Mobility:      | Auto            |
| Fragment Ion Selection Strategy:     | Intensity Based |
| In-Silico Generate Missing Channels: | False           |

**Pulsar Search\Result Filters**

Precursors:

|                               |       |
|-------------------------------|-------|
| Best N Fragments per Peptide: | True  |
| Min:                          | 6     |
| Max:                          | 10    |
| Channel Count:                | False |
| Modifications:                | None  |
| Amino Acids:                  | False |

|                                    |       |
|------------------------------------|-------|
| Best N Peptides per Protein Group: | False |
| FASTA Matched:                     | False |
| Missed Cleavage:                   | False |
| Peptide Charge:                    | False |
| Proteotypicity:                    | False |
| <u>Fragment Ions:</u>              |       |
| m/z:                               | True  |
| Min:                               | 300   |
| Max:                               | 1,800 |
| Ion Charge:                        | False |
| Ion Loss Type:                     | False |
| Ion Type:                          | False |
| Ion AA Length:                     | True  |
| N:                                 | 3     |
| Relative Intensity:                | True  |
| Min:                               | 5     |

---

**Supplementary Table 4: Subunits of the electron transport chain.**

| <b>Complex</b>     | <b>Gene</b>    | <b>Gen name</b>                                                            |
|--------------------|----------------|----------------------------------------------------------------------------|
| <b>Complex I</b>   | <i>MT-Nd1</i>  | NADH-ubiquinone oxidoreductase chain 1                                     |
|                    | <i>MT-Nd4</i>  | NADH-ubiquinone oxidoreductase chain 4                                     |
|                    | <i>Ndufb8</i>  | NADH dehydrogenase [ubiquinone] 1 beta subcomplex subunit 8, mitochondrial |
| <b>Complex II</b>  | <i>Sdha</i>    | Succinate dehydrogenase [ubiquinone] flavoprotein subunit, mitochondrial   |
|                    | <i>Sdhb</i>    | Succinate dehydrogenase [ubiquinone] iron-sulfur subunit, mitochondrial    |
| <b>Complex III</b> | <i>MT-Cytb</i> | Cytochrome b                                                               |
|                    | <i>Uqcrc2</i>  | Cytochrome b-c1 complex subunit 2, mitochondrial                           |
| <b>Complex IV</b>  | <i>Cox4</i>    | Cytochrome c oxidase subunit 4 isoform 1, mitochondrial                    |
|                    | <i>MT-Co1</i>  | Cytochrome c oxidase subunit 1                                             |
| <b>Complex V</b>   | <i>Atp5a1</i>  | ATP synthase subunit alpha, mitochondrial                                  |

**Supplementary Table 5. Summarized echocardiography data from WT and cKO mice after 21 days of TAC.**

Attached as “Table S5 - Echo - 21 days of TAC – eng.xlsx”

**Supplementary Table 6. Summarized echocardiography data from WT and cKO mice after 56 days of TAC.**

**Supplementary Table 6A. WT\_TAC vs. WT\_Shram & cKO\_TAC vs. cKO\_Shram.**

**Supplementary Table 6B. cKO\_Shram vs. WT\_Shram & cKO\_TAC vs. WT\_TAC.**

Attached as “Table S6 A,B - Echo - 56 days of TAC - eng.xlsx”
