# Supplementary material for: Metabolic remodeling in cardiac hypertrophy and heart failure with reduced ejection fraction occurs independent of transcription factor EB in mice
Source: PubMed Central journal article supplement (PMC10800928; doi:10.3389/fcvm.2023.1323760), 2024-01-08
Supplement: Datasheet2.pdf [file Datasheet2.pdf]

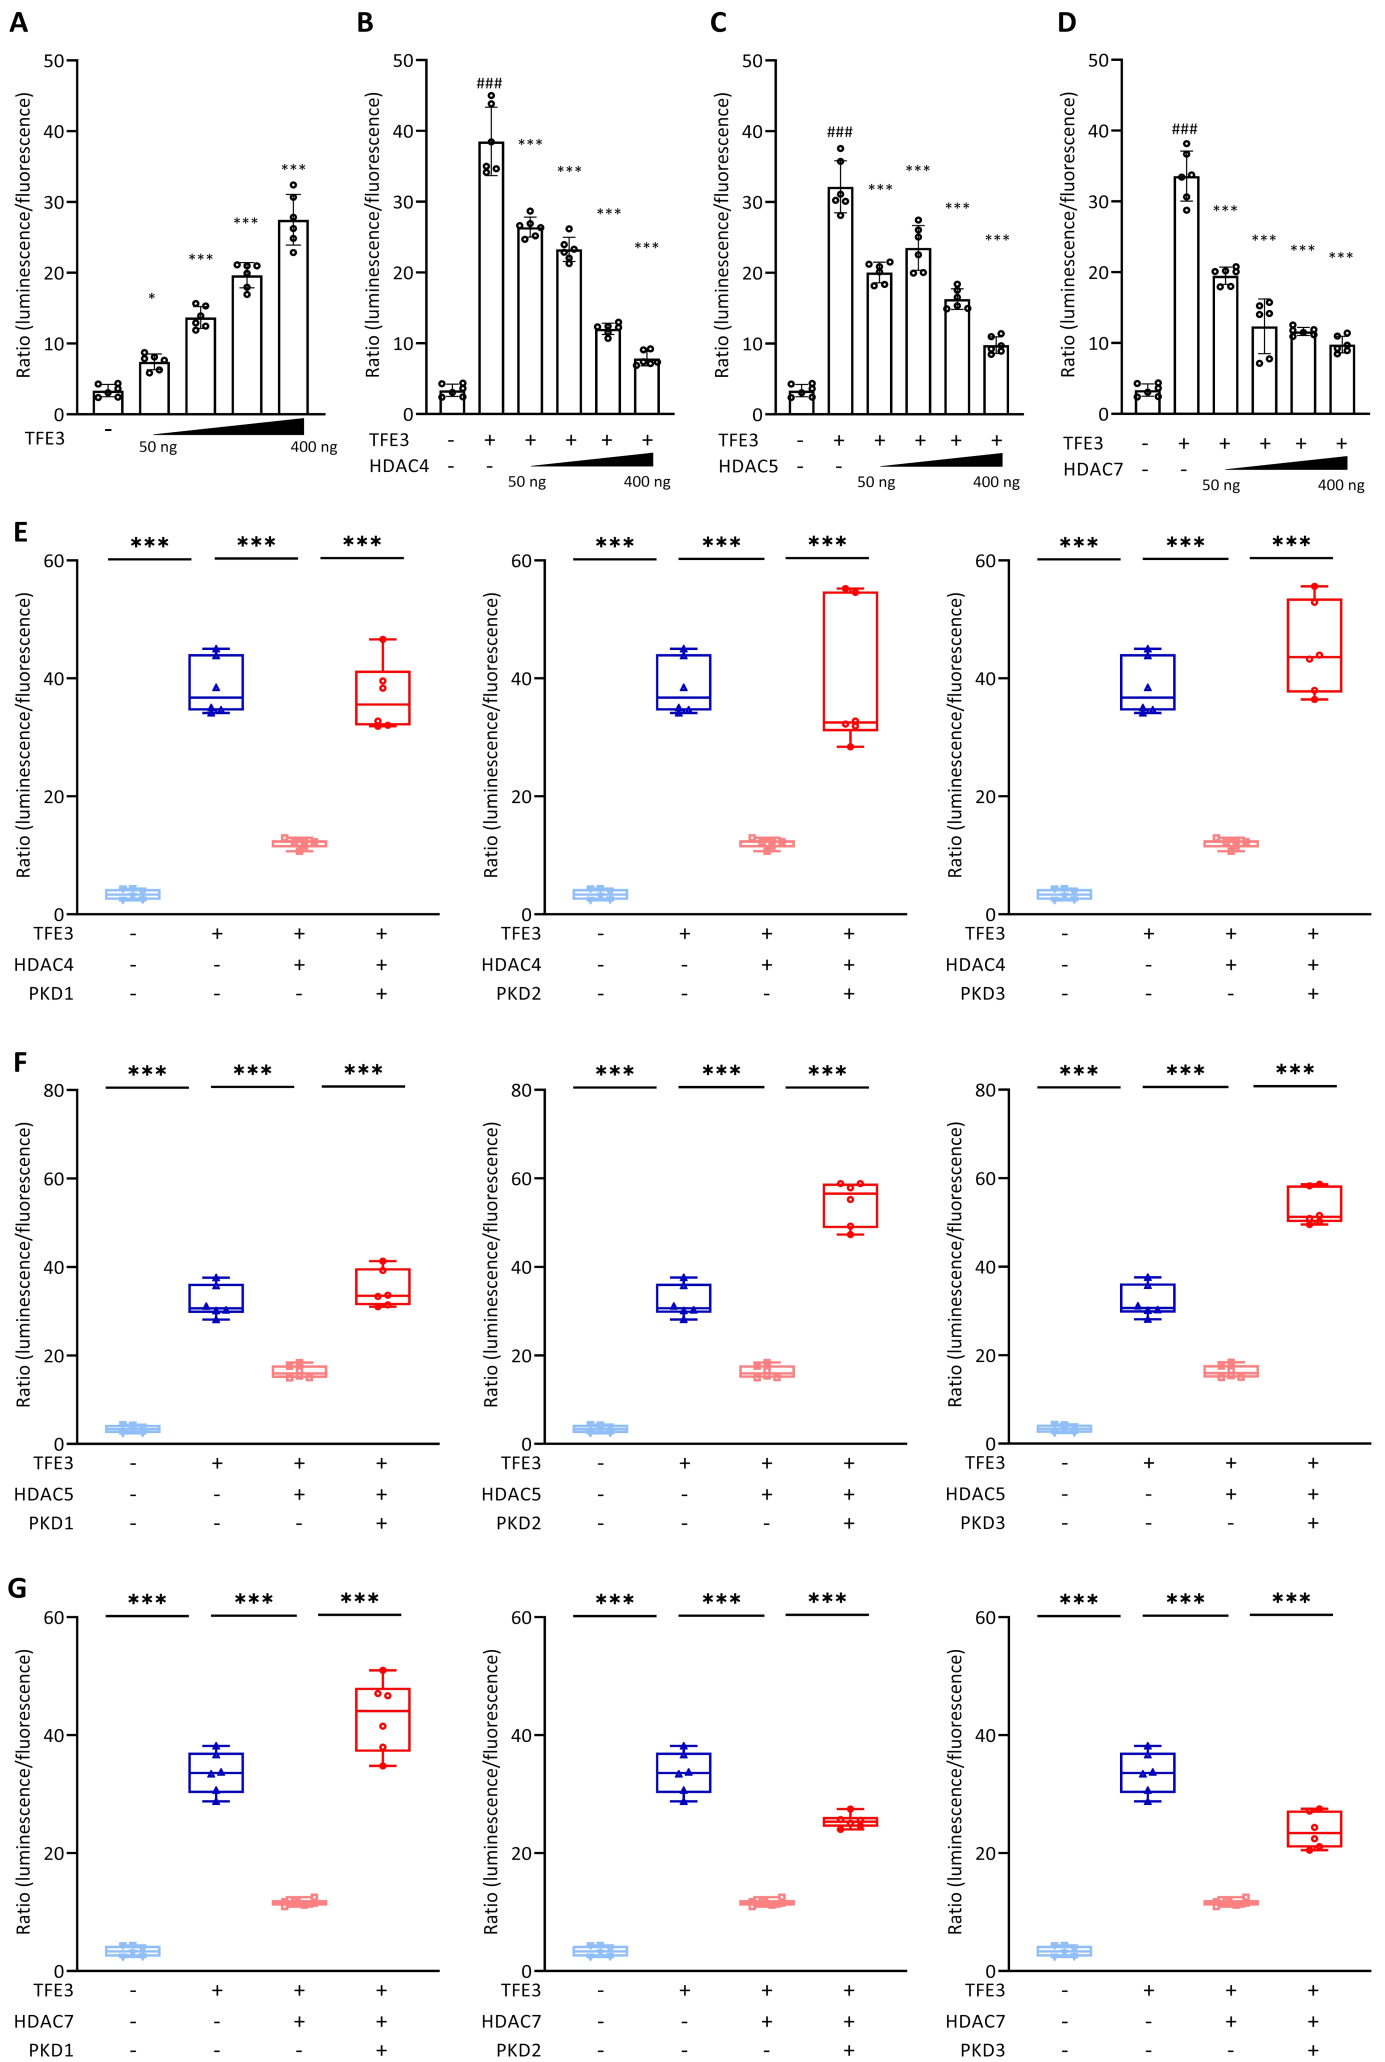

**Figure S1**

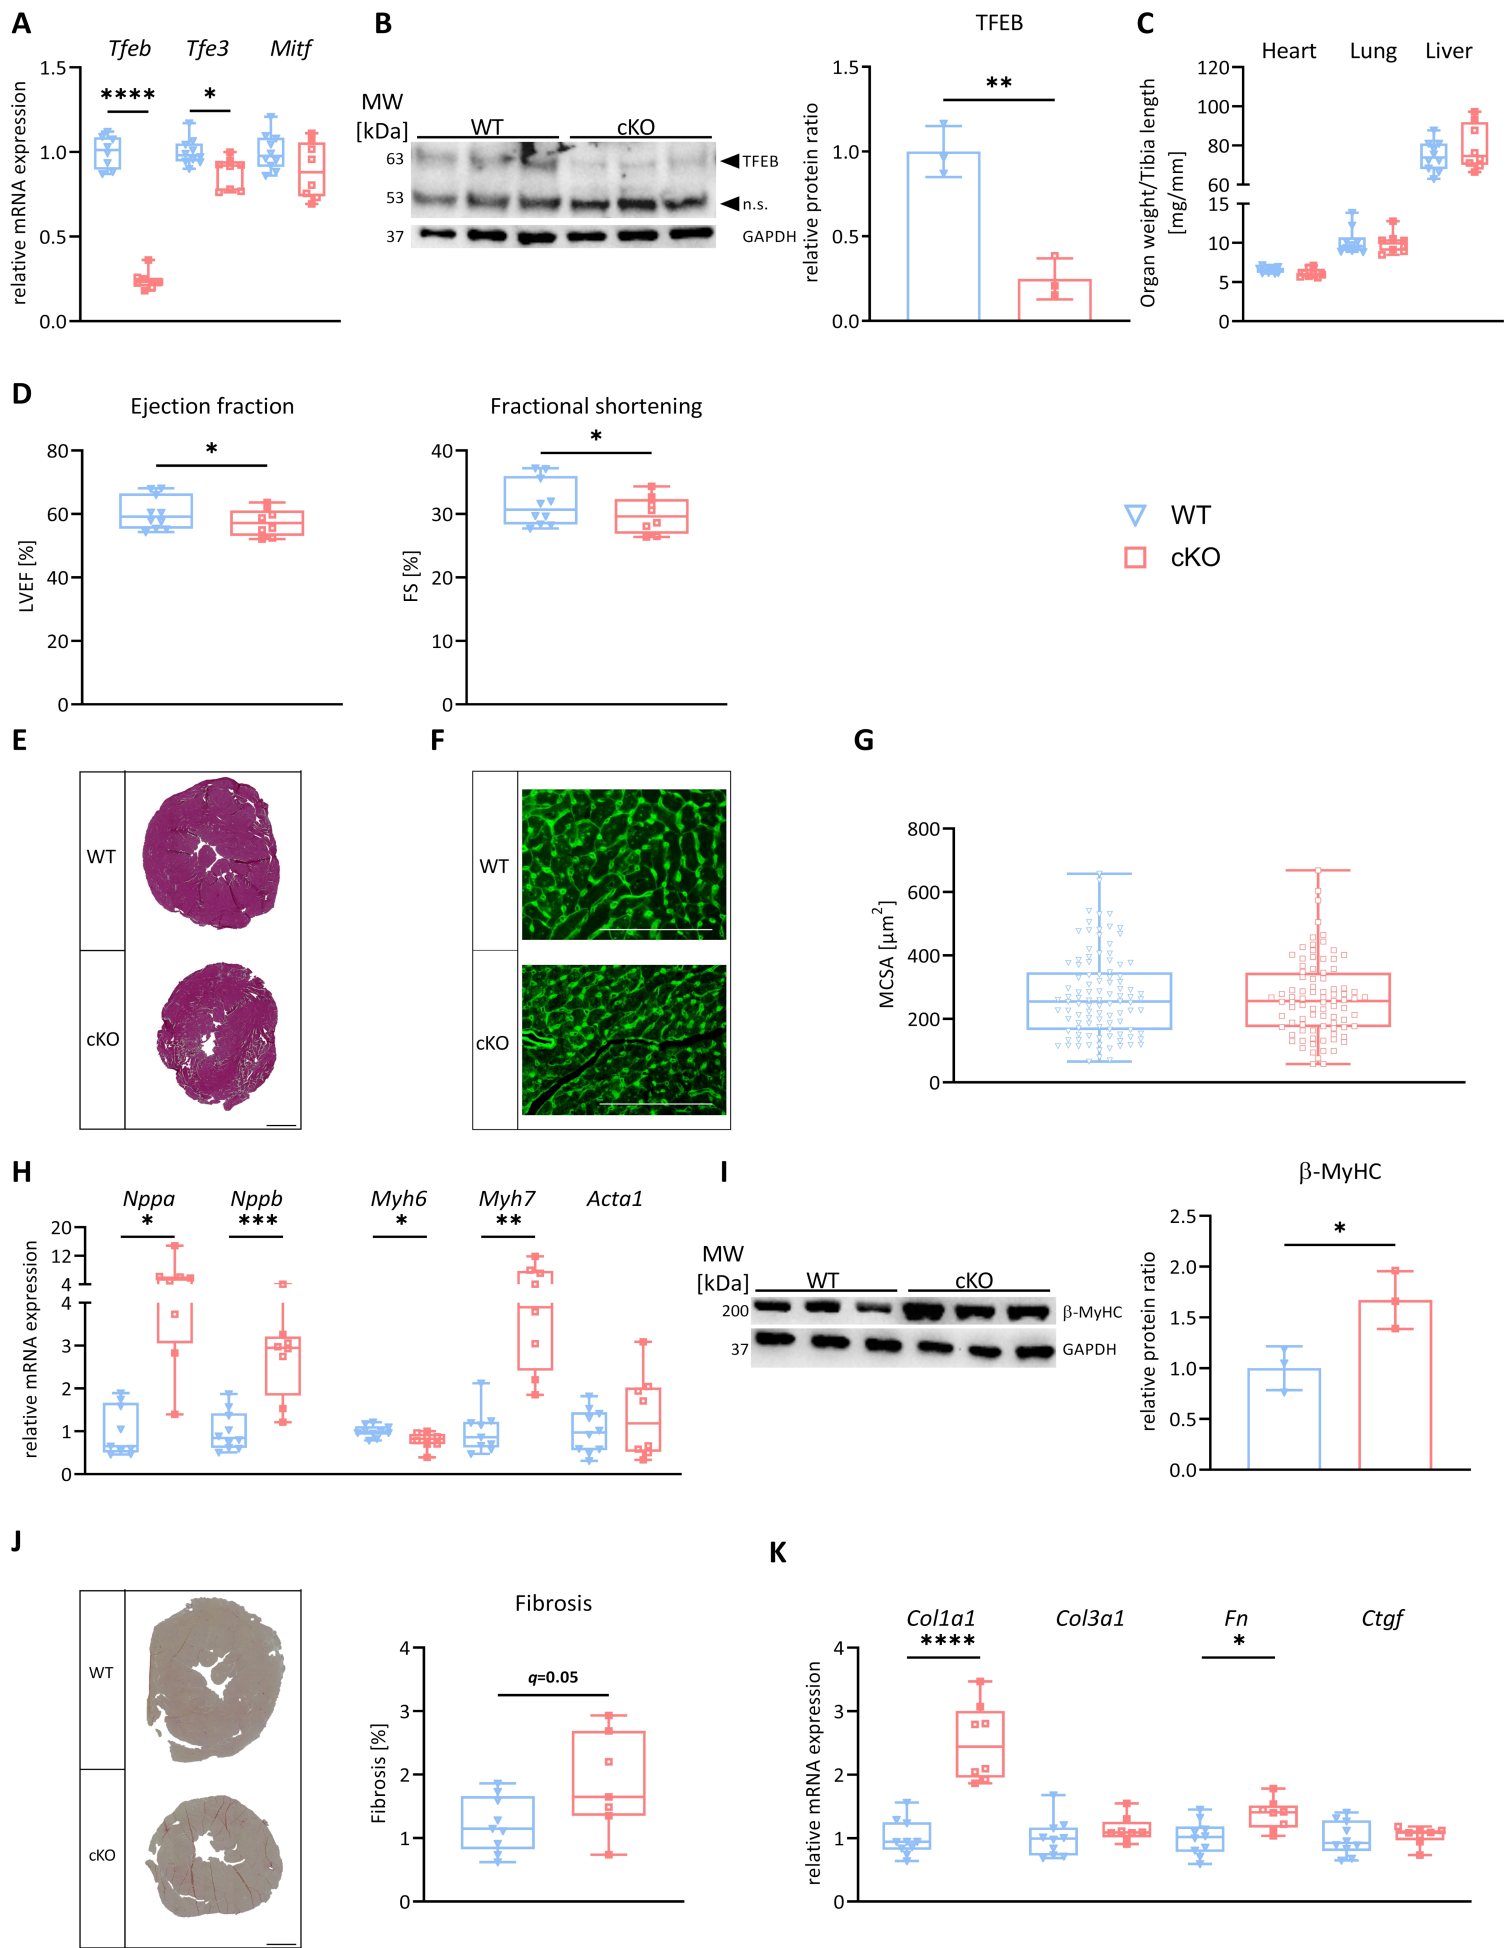

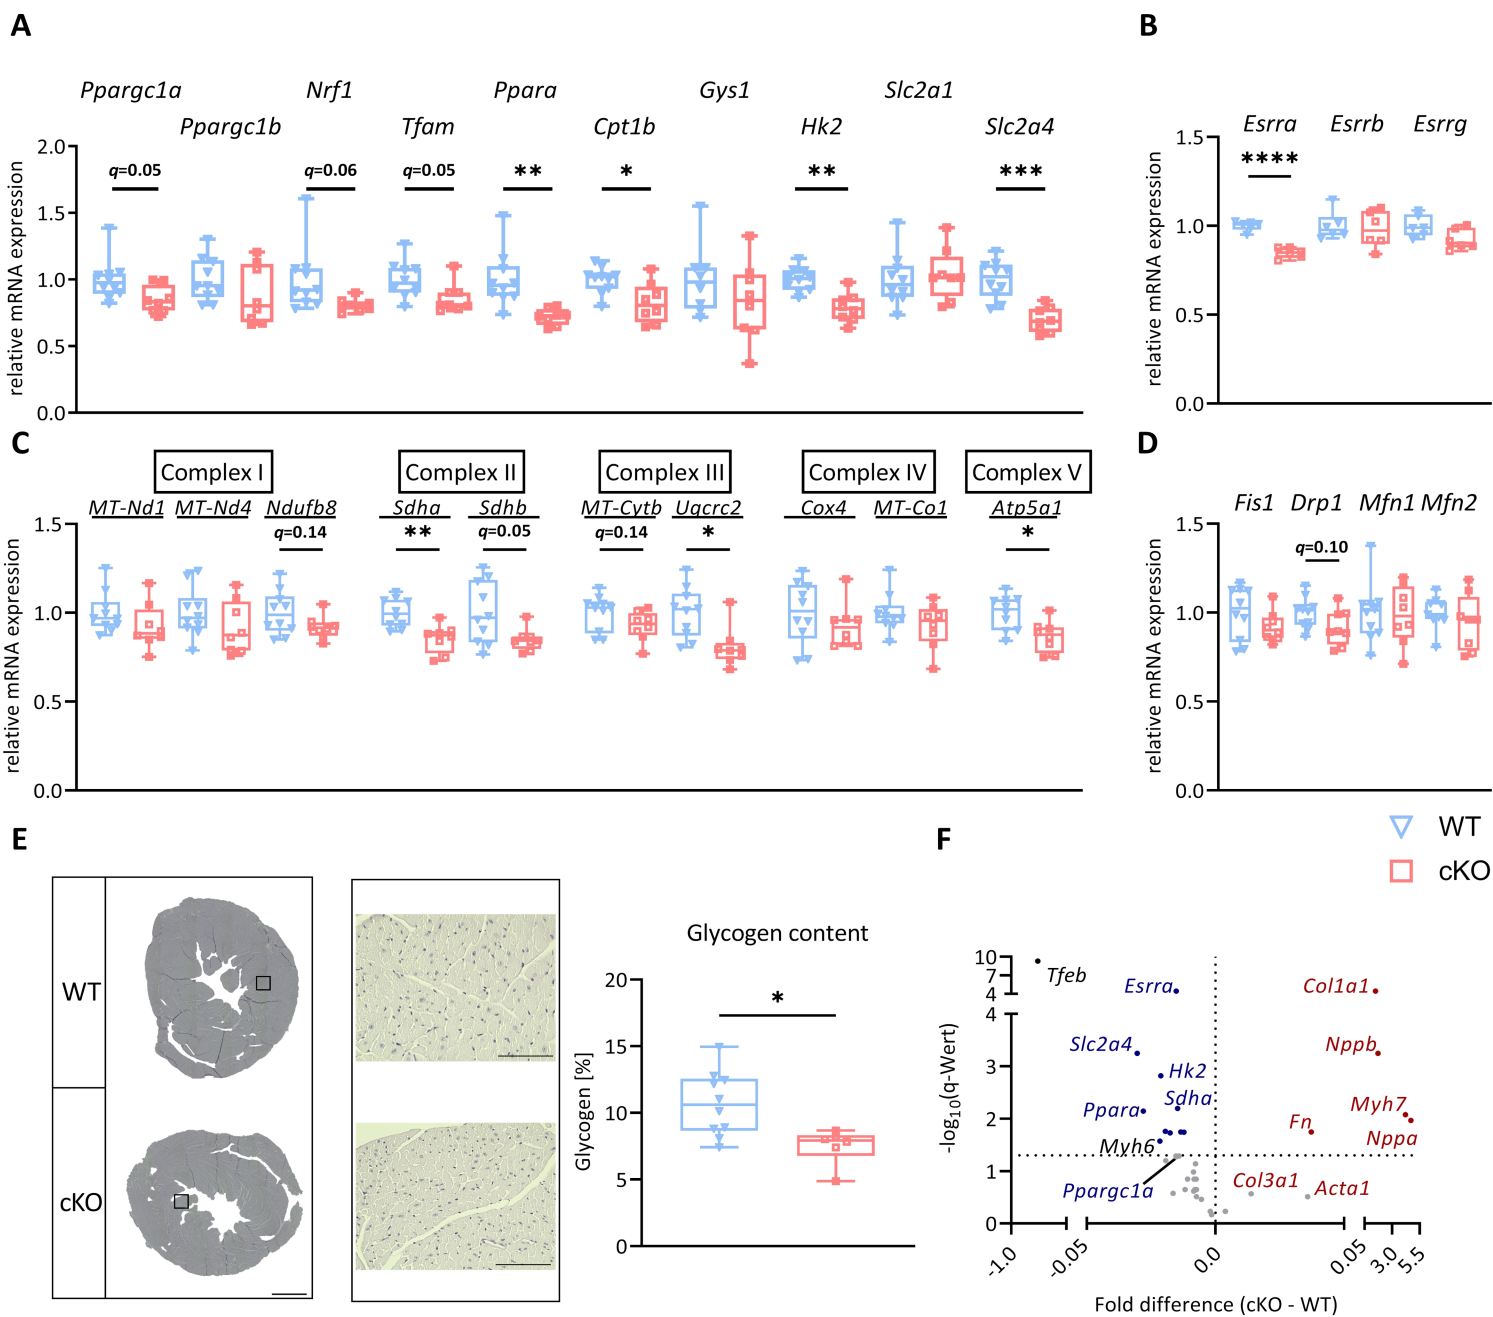

Figure S3

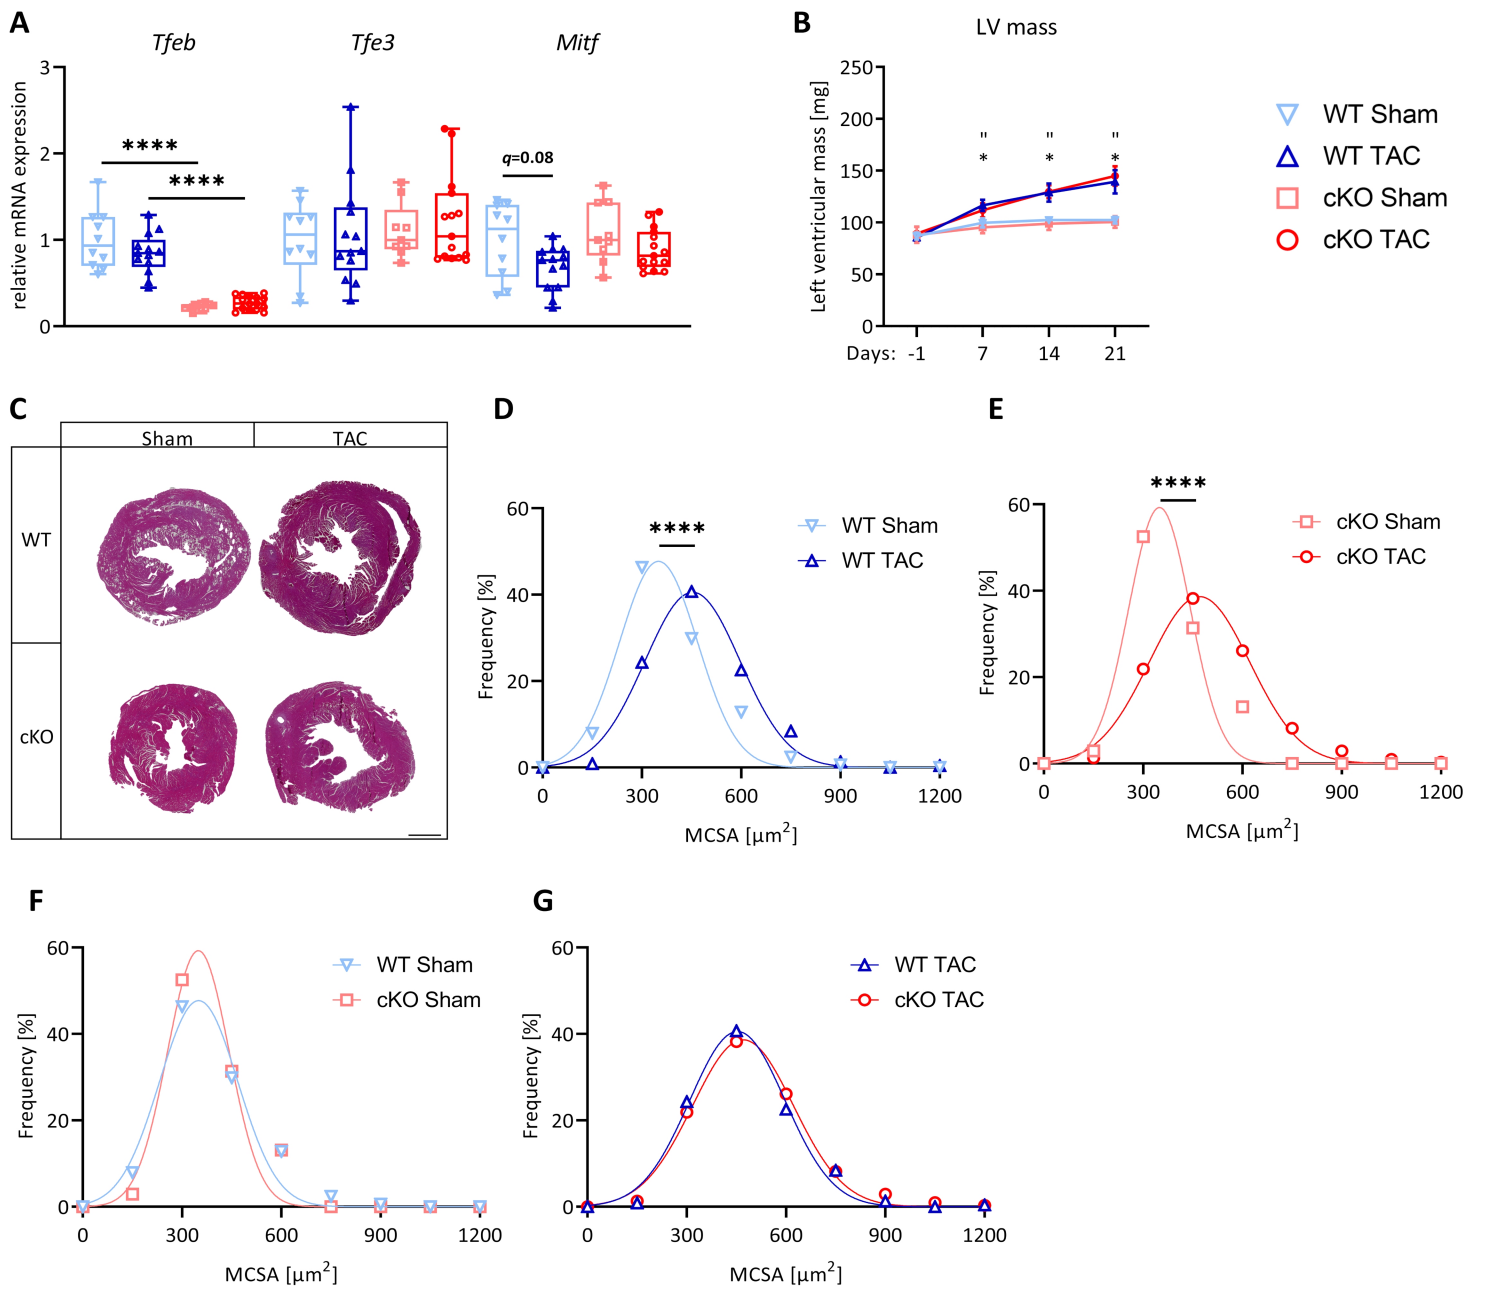

Figure S4



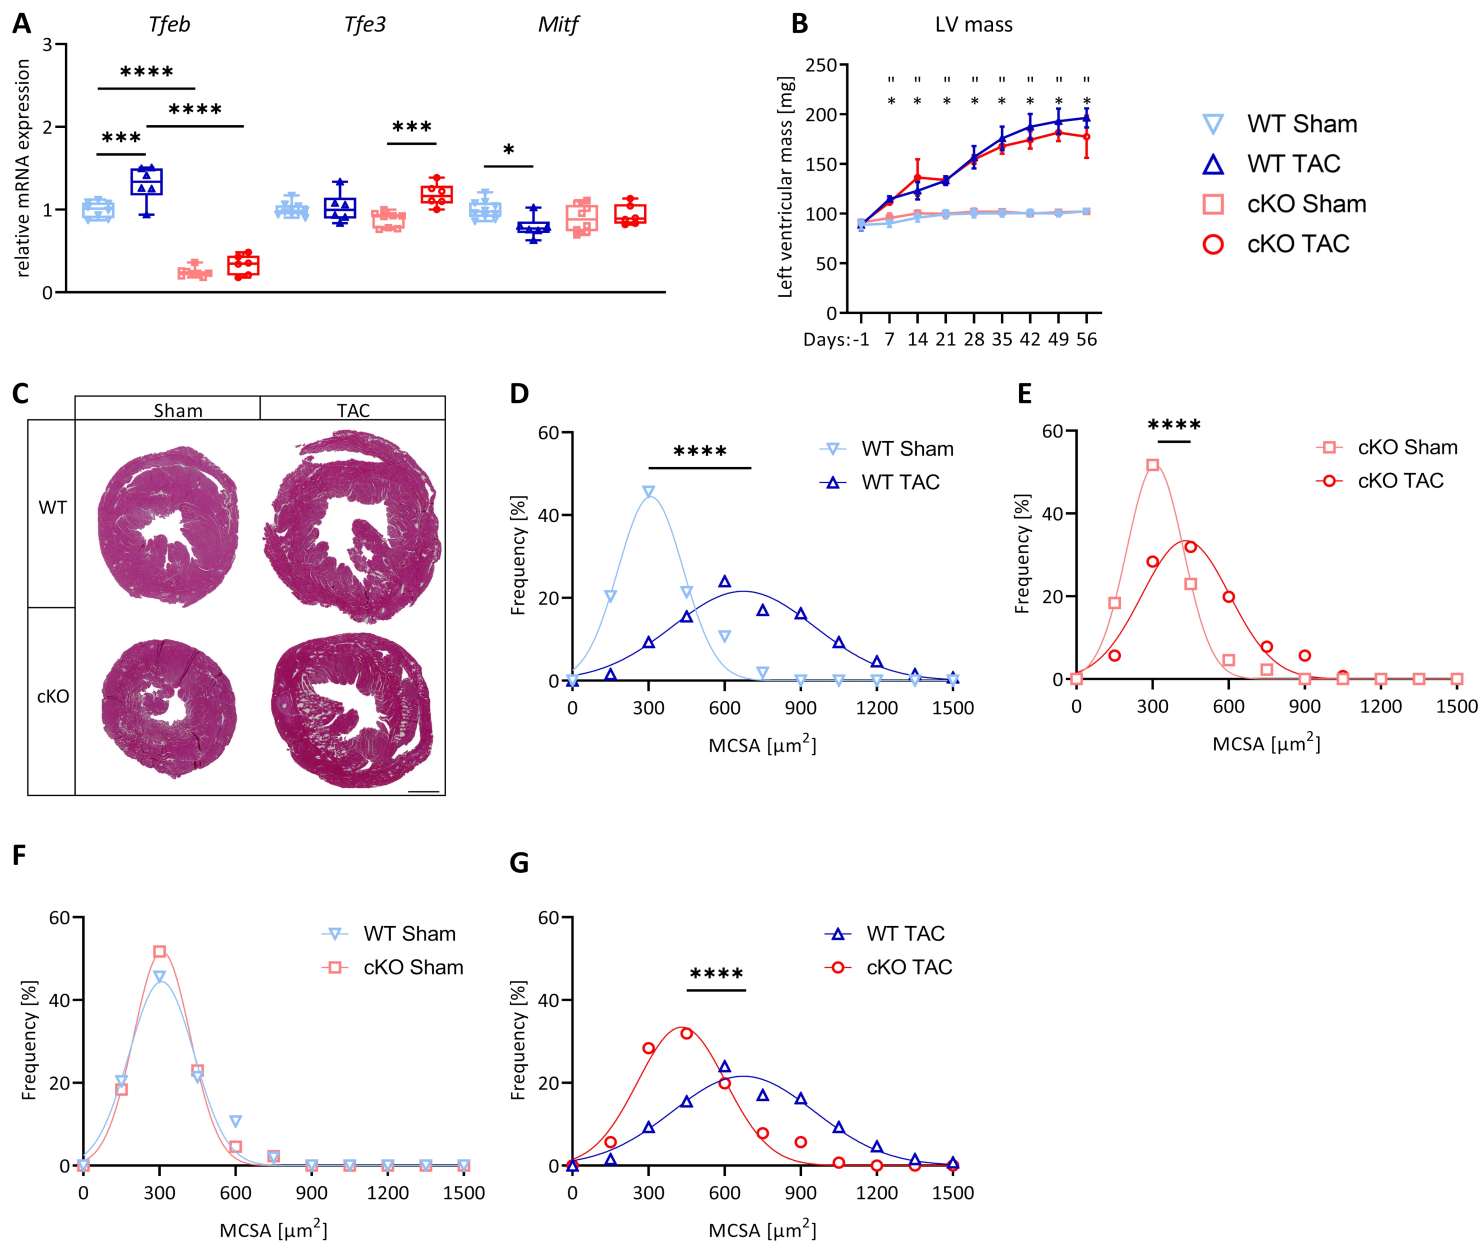

Figure S5

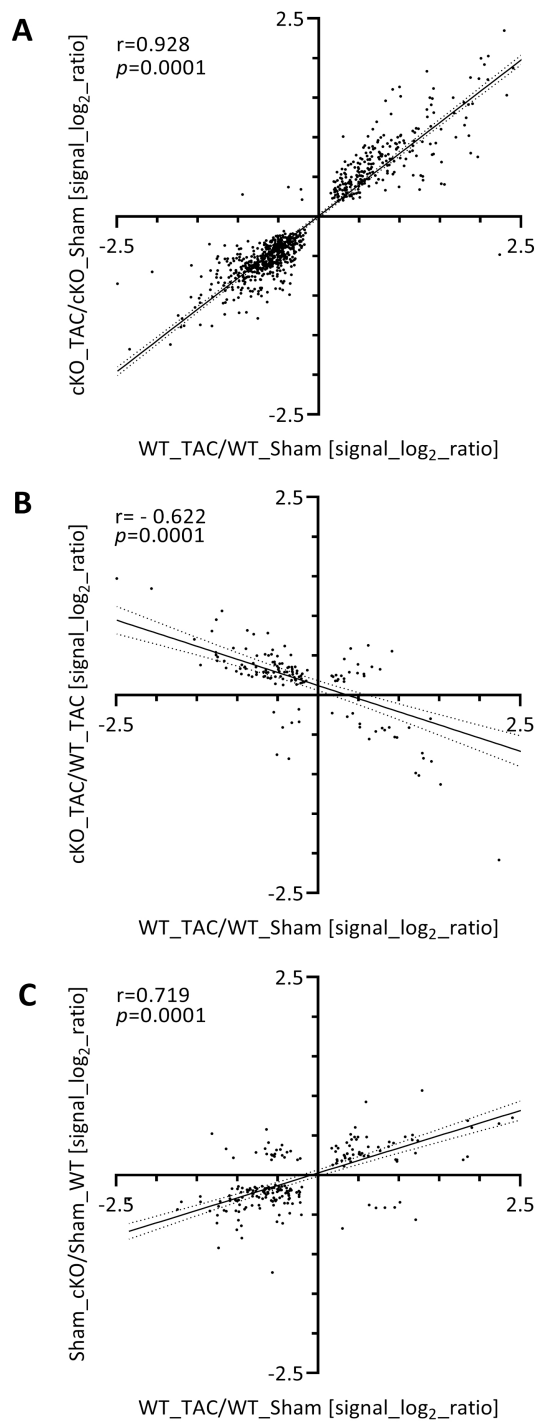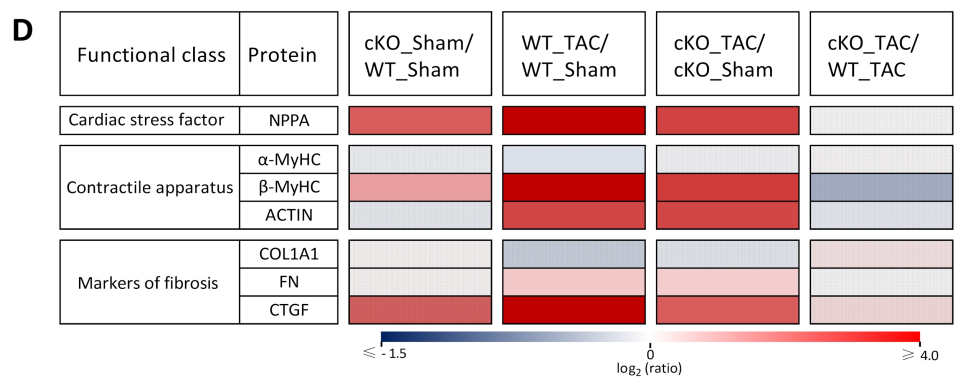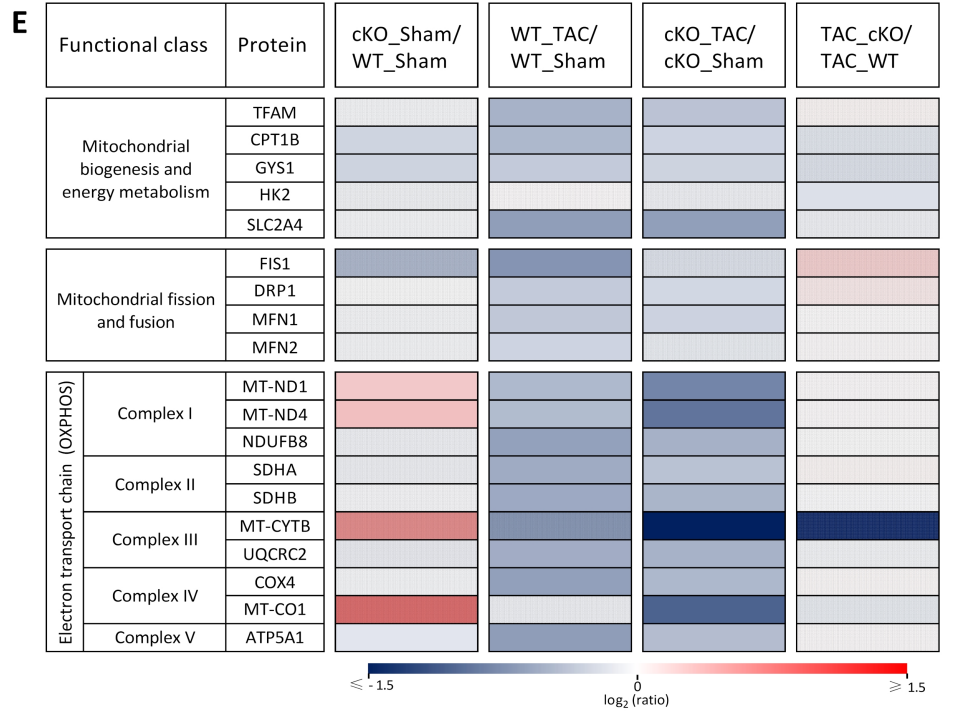

Figure S6

**A**

| Oxidative Phosphorylation | Proteine     | cKO_Sham/<br>WT_Sham | WT_TAC/<br>WT_Sham | cKO_TAC/<br>cKO_Sham | cKO_TAC/<br>WT_TAC |
|---------------------------|--------------|----------------------|--------------------|----------------------|--------------------|
|                           | NDUFA11 [CI] |                      |                    |                      |                    |
| SDHC [II]                 |              |                      |                    |                      |                    |
| NDUFAB1 [I]               |              |                      |                    |                      |                    |
| MTCO1 [IV]                |              |                      |                    |                      |                    |
| ATPAF1 [V]                |              |                      |                    |                      |                    |
| UQCRB [III]               |              |                      |                    |                      |                    |
| UQCRCF1 [III]             |              |                      |                    |                      |                    |
| ATP5F1B [V]               |              |                      |                    |                      |                    |
| MT-CYB [III]              |              |                      |                    |                      |                    |
| COX6C [IV]                |              |                      |                    |                      |                    |

| Fatty Acid $\beta$ -oxidation I | Proteine | cKO_Sham/<br>WT_Sham | WT_TAC/<br>WT_Sham | cKO_TAC/<br>cKO_Sham | cKO_TAC/<br>WT_TAC |
|---------------------------------|----------|----------------------|--------------------|----------------------|--------------------|
|                                 | HSD17B4  |                      |                    |                      |                    |
| SCP2                            |          |                      |                    |                      |                    |
| ACSL6                           |          |                      |                    |                      |                    |
| ACAA1A                          |          |                      |                    |                      |                    |
| ECHS1                           |          |                      |                    |                      |                    |
| HSD17B8                         |          |                      |                    |                      |                    |
| ACSL1                           |          |                      |                    |                      |                    |
| HSD17B10                        |          |                      |                    |                      |                    |
| ECHDC3                          |          |                      |                    |                      |                    |
| AUH                             |          |                      |                    |                      |                    |
| ECI2                            |          |                      |                    |                      |                    |
| ACADM                           |          |                      |                    |                      |                    |
| HADHA                           |          |                      |                    |                      |                    |
| HADH                            |          |                      |                    |                      |                    |
| HADHB                           |          |                      |                    |                      |                    |
| ECI1                            |          |                      |                    |                      |                    |
| SLC27A1                         |          |                      |                    |                      |                    |
| IVD                             |          |                      |                    |                      |                    |
| ACAA2                           |          |                      |                    |                      |                    |

| Superpathway of<br>Cholesterol<br>Biosynthesis | Proteine | cKO_Sham/<br>WT_Sham | WT_TAC/<br>WT_Sham | cKO_TAC/<br>cKO_Sham | cKO_TAC/<br>WT_TAC |
|------------------------------------------------|----------|----------------------|--------------------|----------------------|--------------------|
|                                                | LBR      |                      |                    |                      |                    |
| ACAT1                                          |          |                      |                    |                      |                    |
| HADHA                                          |          |                      |                    |                      |                    |
| HADHB                                          |          |                      |                    |                      |                    |
| ACAA2                                          |          |                      |                    |                      |                    |

**B**

| NRF2-mediated Oxidative<br>Stress Response | Proteine | cKO_Sham/<br>WT_Sham | WT_TAC/<br>WT_Sham | cKO_TAC/<br>cKO_Sham | cKO_TAC/<br>WT_TAC |
|--------------------------------------------|----------|----------------------|--------------------|----------------------|--------------------|
|                                            | NQO1     |                      |                    |                      |                    |
| SOD3                                       |          |                      |                    |                      |                    |
| TXNRD1                                     |          |                      |                    |                      |                    |
| ABCC1                                      |          |                      |                    |                      |                    |
| RALA                                       |          |                      |                    |                      |                    |
| CBR1                                       |          |                      |                    |                      |                    |
| SOD1                                       |          |                      |                    |                      |                    |
| AKR7A2                                     |          |                      |                    |                      |                    |

| Actin Cytoskeleton Signaling | Proteine | cKO_Sham/<br>WT_Sham | WT_TAC/<br>WT_Sham | cKO_TAC/<br>cKO_Sham | cKO_TAC/<br>WT_TAC |
|------------------------------|----------|----------------------|--------------------|----------------------|--------------------|
|                              | PPP1R12A |                      |                    |                      |                    |
| CFL2                         |          |                      |                    |                      |                    |
| MYH9                         |          |                      |                    |                      |                    |
| MSN                          |          |                      |                    |                      |                    |
| ACTN4                        |          |                      |                    |                      |                    |
| MYL12B                       |          |                      |                    |                      |                    |
| FLNA                         |          |                      |                    |                      |                    |
| ARPC1A                       |          |                      |                    |                      |                    |
| ARPC5                        |          |                      |                    |                      |                    |
| RALA                         |          |                      |                    |                      |                    |
| ITGA1                        |          |                      |                    |                      |                    |
| FGF1                         |          |                      |                    |                      |                    |
| MYLK                         |          |                      |                    |                      |                    |
| MYLK3                        |          |                      |                    |                      |                    |

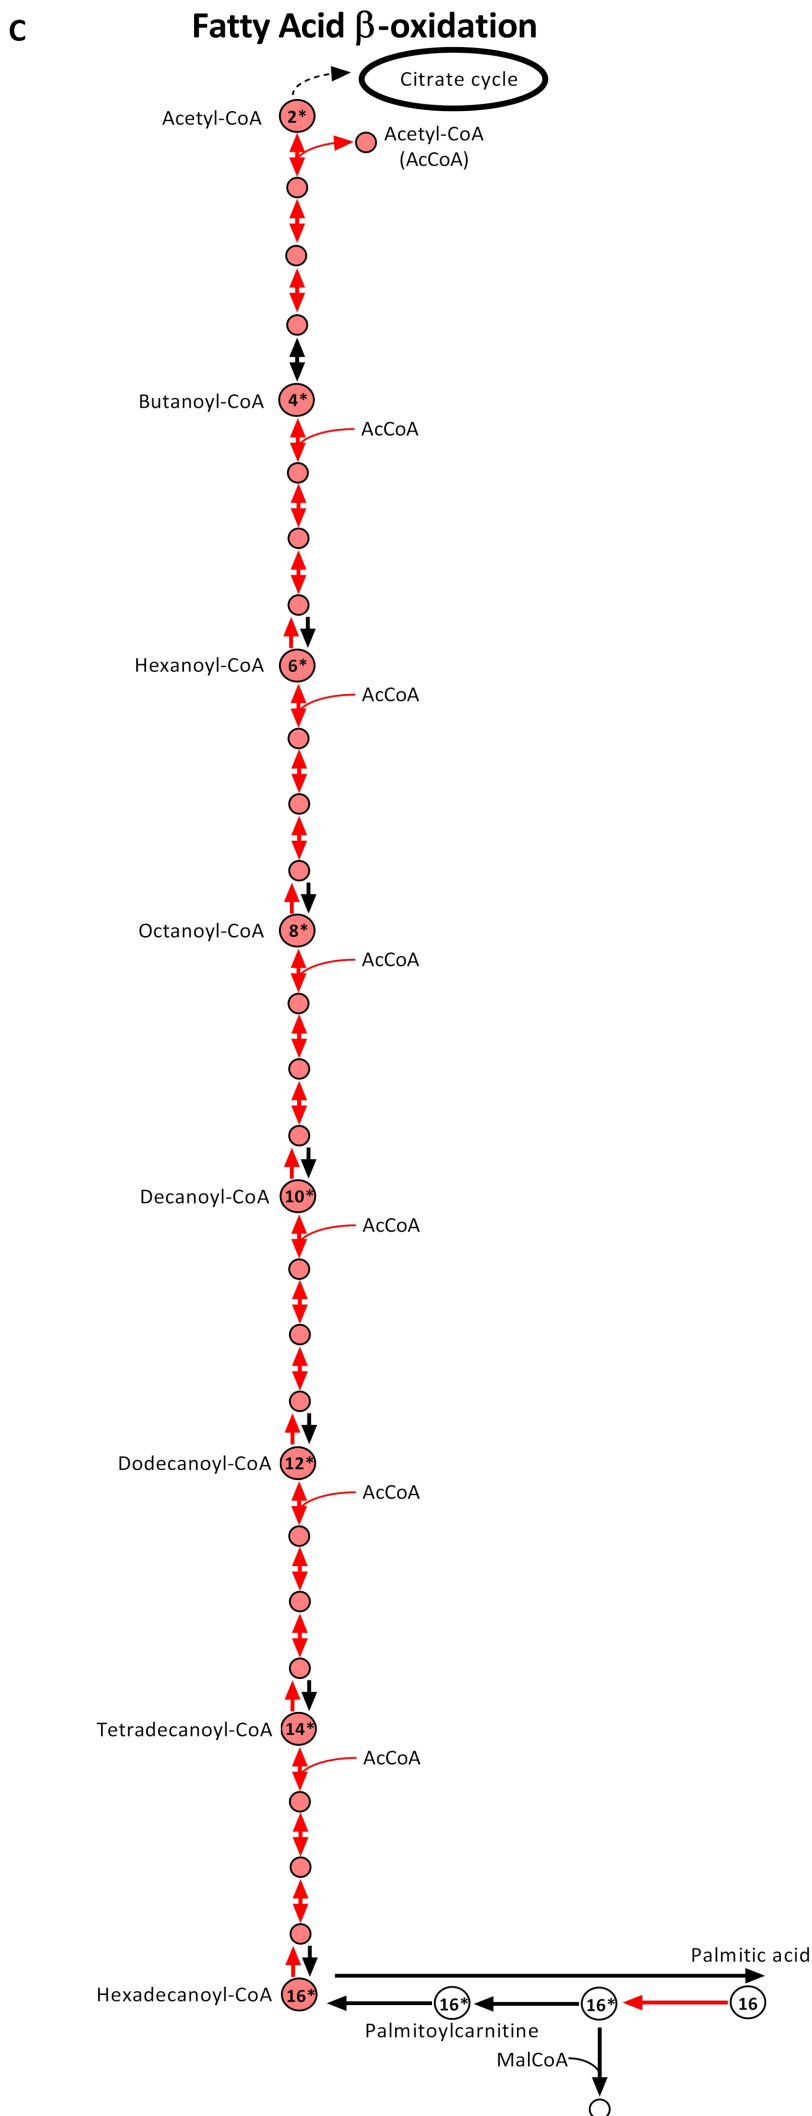

Figure S7
