# Supplementary material for: Metabolic remodeling in cardiac hypertrophy and heart failure with reduced ejection fraction occurs independent of transcription factor EB in mice
Source: Front Cardiovasc Med. 2024 Jan 8;10:1323760. doi: 10.3389/fcvm.2023.1323760 (PMC10800928; doi:10.3389/fcvm.2023.1323760)
Supplement: Supplementary file 1 [file Table5.xlsx]

## Sheet: Echo - 21 days of TAC
		LV mass (mg)
	Days	WT_Sham		WT_TAC		cKO_Sham		cKO_TAC
	-1	87.0 ±3.2		85.2 ±4.7		87.9 ±7.3		89.2 ±6.3
	7	99.6 ±4.1		116.5 ±5.1	**	95.2 ±5.4		111.8 ±6.7	**
	14	102.3 ±1.9		128.9 ±8.3	****	98.8 ±5.7		129.7 ±6.0	****
	21	102.3 ±3.2		139.2 ±10.	***	100.5 ±5.3		144.9 ±9.0	****
		LVESD (mm)										LVESV (µL)
	Days	WT_Sham		WT_TAC		cKO_Sham		cKO_TAC			Days	WT_Sham		WT_TAC		cKO_Sham		cKO_TAC
	-1	2.5 ±0.4		2.6 ±0.2		2.7 ±0.1		2.6 ±0.1			-1	24.6 ±10.6		25.6 ±6.5		28.1 ±4.9		25.7 ±5.0
	7	2.7 ±0.2		2.6 ±0.2		2.7 ±0.1		2.5 ±0.1			7	27.9 ±5.3		26.5 ±5.5		27.2 ±4.4		23.1 ±2.7
	14	2.7 ±0.3		2.9 ±0.2		2.4 ±0.2		2.9 ±0.2	**		14	28.7 ±8.6		33.3 ±6.4		20.7 ±5.4		32.8 ±6.1	**
	21	2.8 ±0.1		3.0 ±0.2		2.7 ±0.1		3.0 ±0.3			21	31.3 ±4.0		36.0 ±7.6		28.5 ±4.3		37.1 ±9.3
		LVEDD (mm)										LVEDV (µL)
	Days	WT_Sham		WT_TAC		cKO_Sham		cKO_TAC			Days	WT_Sham		WT_TAC		cKO_Sham		cKO_TAC
	-1	3.8 ±0.4		3.9 ±0.2		3.9 ±0.2		3.9 ±0.2			-1	66.8 ±17.5		67.0 ±9.4		67.2 ±8.6		67.8 ±8.8
	7	3.9 ±0.0		3.5 ±0.2	*	3.9 ±0.1		3.4 ±0.1	**		7	69.8 ±3.8		54.3 ±9.0	*	66.1 ±5.1		50.8 ±5.1	**
	14	3.9 ±0.3		3.7 ±0.1		3.6 ±0.2	#	3.7 ±0.2			14	69.9 ±13.4		60.4 ±7.3		55.7 ±8.2	#	58.8 ±7.8
	21	4.0 ±0.0		3.8 ±0.2		4.0 ±0.2		3.8 ±0.2			21	73.6 ±2.9		63.0 ±9.2		71.0 ±8.9		64.4 ±9.4
		Stroke volume (µL)										Fractional shortening (%)
	Days	WT_Sham		WT_TAC		cKO_Sham		cKO_TAC			Days	WT_Sham		WT_TAC		cKO_Sham		cKO_TAC
	-1	42.2 ±8.2		41.4 ±4.5		39.0 ±4.1	#	42.1 ±6.8			-1	35.1 ±5.5		33.1 ±3.5		30.3 ±1.7		33.2 ±4.3
	7	44.7 ±4.8		27.8 ±6.4	****	38.8 ±3.2		28.6 ±5.5	****		7	31.9 ±4.2		23.7 ±1.7	***	30.8 ±3.2		27.2 ±3.3	&
	14	41.1 ±5.4		27.1 ±3.3	****	35.0 ±4.5		27.5 ±4.7	**		14	31.4 ±3.6		22.1 ±3.2	****	33.7 ±3.9		22.4 ±2.7	****
	21	39.4 ±3.7		27.0 ±2.8	****	42.4 ±5.8		27.2 ±4.3	****		21	29.5 ±3.1		19.9 ±1.5	****	31.4 ±2.4		20.9 ±4.3	****
		Ejection fraction (%)										Cardiac output (µL/min)
	Days	WT_Sham		WT_TAC		cKO_Sham		cKO_TAC			Days	WT_Sham		WT_TAC		cKO_Sham		cKO_TAC
	-1	64.6 ±7.5		62.1 ±5.1		58.3 ±2.6		62.2 ±5.9			-1	17.9 ±4.0		17.1 ±2.7		15.9 ±1.3		18.4 ±3.6
	7	60.2 ±6.0		48.3 ±2.9	***	58.9 ±4.7		53.7 ±5.2	&		7	21.5 ±3.3		13.1 ±3.9	***	17.7 ±3.7		14.7 ±4.8
	14	59.6 ±5.3		45.1 ±5.4	****	63.2 ±5.3		45.7 ±4.7	****		14	18.8 ±2.6		13.0 ±2.4	***	16.9 ±2.6		13.5 ±2.8	*
	21	56.9 ±4.8		41.5 ±2.7	****	59.8 ±3.5		42.9 ±7.6	****		21	19.0 ±3.2		14.6 ±2.0	*	20.3 ±5.0		13.4 ±2.8	*
		LVAWth;s (mm)										LVPWth;s (mm)
	Days	WT_Sham		WT_TAC		cKO_Sham		cKO_TAC			Days	WT_Sham		WT_TAC		cKO_Sham		cKO_TAC
	-1	1.16 ±0.15		1.07 ±0.13		1.05 ±0.08		1.09 ±0.17			-1	1.00 ±0.14		0.91 ±0.09		0.94 ±0.11		0.94 ±0.08
	7	1.17 ±0.26		1.22 ±0.21		1.13 ±0.15		1.31 ±0.18			7	0.98 ±0.20		1.05 ±0.15		0.97 ±0.08		1.16 ±0.14	*
	14	1.12 ±0.13		1.24 ±0.16		1.25 ±0.15		1.26 ±0.10			14	0.99 ±0.12		1.05 ±0.11		1.02 ±0.10		1.13 ±0.10
	21	1.10 ±0.15		1.33 ±0.17	*	1.21 ±0.04		1.32 ±0.16			21	0.98 ±0.12		1.14 ±0.13		1.02 ±0.08		1.13 ±0.07	*
		LVAWth;d (mm)										LVPWth;d (mm)
	Days	WT_Sham		WT_TAC		cKO_Sham		cKO_TAC			Days	WT_Sham		WT_TAC		cKO_Sham		cKO_TAC
	-1	0.66 ±0.16		0.65 ±0.09		0.65 ±0.08		0.69 ±0.06			-1	0.67 ±0.09		0.63 ±0.06		0.66 ±0.07		0.62 ±0.05
	7	0.69 ±0.09		0.93 ±0.10	*	0.74 ±0.10		0.94 ±0.15			7	0.70 ±0.10		0.86 ±0.11		0.66 ±0.08		0.89 ±0.14	**
	14	0.72 ±0.10		0.96 ±0.09	**	0.85 ±0.09	#	0.95 ±0.09			14	0.71 ±0.07		0.90 ±0.08	**	0.73 ±0.06		0.90 ±0.11	*
	21	0.70 ±0.10		1.00 ±0.13	***	0.73 ±0.06		1.01 ±0.13	***		21	0.73 ±0.10		0.95 ±0.08	**	0.67 ±0.06		0.92 ±0.10	****
