# Supplementary material for: Metabolic remodeling in cardiac hypertrophy and heart failure with reduced ejection fraction occurs independent of transcription factor EB in mice
Source: Front Cardiovasc Med. 2024 Jan 8;10:1323760. doi: 10.3389/fcvm.2023.1323760 (PMC10800928; doi:10.3389/fcvm.2023.1323760)
Supplement: Supplementary file 2 [file Table6.xlsx]

## Sheet: Echo - 56 days of TAC
	WT_TAC vs. WT_Sham & cKO_TAC vs. cKO_Sham																				cKO_Sham vs. WT_Sham & cKO_TAC vs. WT_TAC
		LV mass (mg)																				LV mass (mg)
	Days	WT_Sham		WT_TAC		cKO_Sham		cKO_TAC													Days	WT_Sham		WT_TAC		cKO_Sham		cKO_TAC
	-1	88.6±2.0		88.3±2.6		91.2±2.3		89.6±2.6													-1	88.6±2.0		88.3±2.6		91.2±2.3		89.6±2.6
	7	92.1±2.9		117.3±2.8	****	95.0±3.0		111.3±3.4	***												7	92.1±2.9		117.3±2.8		95.0±3.0		111.3±3.4
	14	96.0±2.0		123.0±2.6	****	100.2±2.3		136.3±2.6	****												14	96.0±2.0		123.0±2.6		100.2±2.3		136.3±2.6	***
	21	101.2±2.9		136.0±2.8	****	99.4±3.0		133.9±3.4	****												21	101.2±2.9		136.0±2.8		99.4±3.0		133.9±3.4
	28	100.1±2.0		156.7±2.6	****	101.9±2.3		154.3±2.6	****												28	100.1±2.0		156.7±2.6		101.9±2.3		154.3±2.6
	35	100.5±2.2		175.7±2.6	****	101.8±2.3		167.7±2.6	****												35	100.5±2.2		175.7±2.6		101.8±2.3		167.7±2.6	*
	42	100.5±2.0		187.4±2.6	****	100.1±2.3		174.1±2.6	****												42	100.5±2.0		187.4±2.6		100.1±2.3		174.1±2.6	***
	49	100.1±2.0		192.9±2.6	****	101.2±2.4		181.5±2.6	****												49	100.1±2.0		192.9±2.6		101.2±2.4		181.5±2.6	**
	56	102.3±2.0		195.5±3.1	****	102.1±2.3		179.3±2.8	****												56	102.3±2.0		195.5±3.1		102.1±2.3		179.3±2.8	***
		LVESD (mm)										LVESV (µL)										LVESD (mm)										LVESV (µL)
	Days	WT_Sham		WT_TAC		cKO_Sham		cKO_TAC			Days	WT_Sham		WT_TAC		cKO_Sham		cKO_TAC			Days	WT_Sham		WT_TAC		cKO_Sham		cKO_TAC			Days	WT_Sham		WT_TAC		cKO_Sham		cKO_TAC
	-1	2.6±0.08		2.8±0.09	0.09	2.6±0.08		2.8±0.09	0.09		-1	26.4±3.0		31.5±3.6		25.9±3.2		31.0±3.6			-1	2.6±0.08		2.8±0.09		2.6±0.08		2.8±0.09			-1	26.4±3.0		31.5±3.6		25.9±3.2		31.0±3.6
	7	2.7±0.10		3.0±0.11	*	2.7±0.10		3.1±0.11	*		7	29.3±3.8		39.4±4.0	0.05	28.8±3.9		38.9±4.0	0.05		7	2.7±0.10		3.0±0.11		2.7±0.10		3.1±0.11			7	29.3±3.8		39.4±4.0		28.8±3.9		38.9±4.0
	14	2.8±0.08		3.6±0.09	****	2.8±0.08		3.6±0.09	****		14	32.3±3.0		57.1±3.6	****	31.8±3.2		56.6±3.6	****		14	2.8±0.08		3.6±0.09		2.8±0.08		3.6±0.09			14	32.3±3.0		57.1±3.6		31.8±3.2		56.6±3.6
	21	2.7±0.10		3.5±0.11	****	2.8±0.10		3.5±0.11	****		21	29.9±3.8		54.6±4.0	****	29.4±3.9		54.1±4.0	****		21	2.7±0.10		3.5±0.11		2.8±0.10		3.5±0.11			21	29.9±3.8		54.6±4.0		29.4±3.9		54.1±4.0
	28	2.8±0.08		3.6±0.09	****	2.8±0.08		3.6±0.09	****		28	30.4±3.0		57.4±3.6	****	29.9±3.2		56.9±3.6	****		28	2.8±0.08		3.6±0.09		2.8±0.08		3.6±0.09			28	30.4±3.0		57.4±3.6		29.9±3.2		56.9±3.6
	35	2.8±0.08		3.8±0.09	****	2.8±0.08		3.8±0.09	****		35	31.6±3.1		67.3±3.6	****	31.1±3.3		66.8±3.6	****		35	2.8±0.08		3.8±0.09		2.8±0.08		3.8±0.09			35	31.6±3.1		67.3±3.6		31.1±3.3		66.8±3.6
	42	2.7±0.08		3.9±0.09	****	2.8±0.08		3.9±0.09	****		42	30.1±3.0		70.2±3.6	****	29.6±3.2		69.7±3.6	****		42	2.7±0.08		3.9±0.09		2.8±0.08		3.9±0.09			42	30.1±3.0		70.2±3.6		29.6±3.2		69.7±3.6
	49	2.8±0.08		4.0±0.09	****	2.8±0.08		4.0±0.09	****		49	32.4±3.0		73.2±3.6	****	31.9±3.2		72.7±3.6	****		49	2.8±0.08		4.0±0.09		2.8±0.08		4.0±0.09			49	32.4±3.0		73.2±3.6		31.9±3.2		72.7±3.6
	56	2.7±0.08		3.9±0.10	****	2.7±0.08		3.9±0.10	****		56	29.3±3.0		68.3±3.9	****	28.8±3.2		67.8±3.9	****		56	2.7±0.08		3.9±0.10		2.7±0.08		3.9±0.10			56	29.3±3.0		68.3±3.9		28.8±3.2		67.8±3.9
		LVEDD (mm)										LVEDV (µL)										LVEDD (mm)										LVEDV (µL)
	Days	WT_Sham		WT_TAC		cKO_Sham		cKO_TAC			Days	WT_Sham		WT_TAC		cKO_Sham		cKO_TAC			Days	WT_Sham		WT_TAC		cKO_Sham		cKO_TAC			Days	WT_Sham		WT_TAC		cKO_Sham		cKO_TAC
	-1	3.8±0.07		3.9±0.09		3.8±0.08		4.0±0.09			-1	63.3±3.6		70.2±4.4		63.9±3.8		70.8±4.4			-1	3.8±0.07		3.9±0.09		3.8±0.08		4.0±0.09			-1	63.3±3.6		70.2±4.4		63.9±3.8		70.8±4.4
	7	3.8±0.10		3.8±0.10		3.8±0.10		3.8±0.10			7	64.1±4.6		66.1±4.9		64.6±4.7		66.6±4.9			7	3.8±0.10		3.8±0.10		3.8±0.10		3.8±0.10			7	64.1±4.6		66.1±4.9		64.6±4.7		66.6±4.9
	14	3.9±0.07		4.3±0.09	**	4.0±0.08		4.3±0.09	**		14	69.5±3.6		85.6±4.4	**	70.0±3.8		86.1±4.4	**		14	3.9±0.07		4.3±0.09		4.0±0.08		4.3±0.09			14	69.5±3.6		85.6±4.4		70.0±3.8		86.1±4.4
	21	3.8±0.10		4.1±0.10	*	3.8±0.10		4.1±0.10	*		21	64.0±4.6		78.1±4.9	*	64.5±4.7		78.7±4.9	*		21	3.8±0.10		4.1±0.10		3.8±0.10		4.1±0.10			21	64.0±4.6		78.1±4.9		64.5±4.7		78.7±4.9
	28	3.9±0.07		4.1±0.09	*	3.9±0.08		4.2±0.09	*		28	67.8±3.6		80.0±4.4	*	68.4±3.8		80.5±4.4	*		28	3.9±0.07		4.1±0.09		3.9±0.08		4.2±0.09			28	67.8±3.6		80.0±4.4		68.4±3.8		80.5±4.4
	35	3.9±0.08		4.3±0.09	***	3.9±0.08		4.4±0.09	***		35	68.4±3.7		88.8±4.4	***	68.9±3.9		89.3±4.4	***		35	3.9±0.08		4.3±0.09		3.9±0.08		4.4±0.09			35	68.4±3.7		88.8±4.4		68.9±3.9		89.3±4.4
	42	3.9±0.07		4.4±0.09	****	3.9±0.08		4.4±0.09	****		42	66.5±3.6		89.8±4.4	****	67.0±3.8		90.4±4.4	****		42	3.9±0.07		4.4±0.09		3.9±0.08		4.4±0.09			42	66.5±3.6		89.8±4.4		67.0±3.8		90.4±4.4
	49	3.9±0.08		4.4±0.09	***	4.0±0.08		4.4±0.09	***		49	70.6±3.7		91.3±4.4	***	71.2±3.9		91.9±4.4	***		49	3.9±0.08		4.4±0.09		4.0±0.08		4.4±0.09			49	70.6±3.7		91.3±4.4		71.2±3.9		91.9±4.4
	56	3.8±0.07		4.3±0.10	***	3.8±0.08		4.3±0.10	***		56	64.5±3.6		85.4±4.7	***	65.1±3.8		86.0±4.7	***		56	3.8±0.07		4.3±0.10		3.8±0.08		4.3±0.10			56	64.5±3.6		85.4±4.7		65.1±3.8		86.0±4.7
		Stroke volume (µL)										Fractional shortening (%)										Stroke volume (µL)										Fractional shortening (%)
	Days	WT_Sham		WT_TAC		cKO_Sham		cKO_TAC			Days	WT_Sham		WT_TAC		cKO_Sham		cKO_TAC			Days	WT_Sham		WT_TAC		cKO_Sham		cKO_TAC			Days	WT_Sham		WT_TAC		cKO_Sham		cKO_TAC
	-1	35.3±1.2		41.8±1.5	**	39.9±1.3		36.7±1.5			-1	31.5±0.6		28.1±0.7	***	30.0±0.6		29.6±0.7			-1	35.3±1.2		41.8±1.5		39.9±1.3	*	36.7±1.5	*		-1	31.5±0.6		28.1±0.7		30.0±0.6	*	29.6±0.7	*
	7	32.3±1.8		25.4±1.7	**	38.4±1.8		29.4±2.1	**		7	28.5±0.8		19.8±0.8	****	27.1±0.8		21.3±0.9	****		7	32.3±1.8		25.4±1.7		38.4±1.8	*	29.4±2.1			7	28.5±0.8		19.8±0.8		27.1±0.8	*	21.3±0.9	*
	14	36.8±1.2		30.1±1.5	**	38.5±1.3		27.7±1.5	****		14	28.3±0.6		15.5±0.7	****	26.9±0.6		17.0±0.7	****		14	36.8±1.2		30.1±1.5		38.5±1.3		27.7±1.5			14	28.3±0.6		15.5±0.7		26.9±0.6	*	17.0±0.7	*
	21	34.6±1.8		22.9±1.7	****	34.6±1.8		25.3±2.1	**		21	27.9±0.8		14.2±0.8	****	26.5±0.8		15.6±0.9	****		21	34.6±1.8		22.9±1.7		34.6±1.8		25.3±2.1			21	27.9±0.8		14.2±0.8		26.5±0.8	*	15.6±0.9	*
	28	37.6±1.2		23.1±1.5	****	38.1±1.3		23.0±1.5	****		28	29.5±0.6		12.8±0.7	****	28.0±0.6		14.2±0.7	****		28	37.6±1.2		23.1±1.5		38.1±1.3		23.0±1.5			28	29.5±0.6		12.8±0.7		28.0±0.6	*	14.2±0.7	*
	35	37.0±1.3		21.4±1.5	****	37.6±1.3		22.4±1.5	****		35	28.6±0.6		11.0±0.7	****	27.1±0.6		12.4±0.7	****		35	37.0±1.3		21.4±1.5		37.6±1.3		22.4±1.5			35	28.6±0.6		11.0±0.7		27.1±0.6	*	12.4±0.7	*
	42	36.9±1.2		18.3±1.5	****	36.5±1.3		21.8±1.5	****		42	28.9±0.6		9.73±0.7	****	27.5±0.6		11.1±0.7	****		42	36.9±1.2		18.3±1.5		36.5±1.3		21.8±1.5			42	28.9±0.6		9.73±0.7		27.5±0.6	*	11.1±0.7	*
	49	38.0±1.2		18.4±1.5	****	39.5±1.4		18.8±1.5	****		49	28.7±0.6		8.88±0.7	****	27.3±0.6		10.3±0.7	****		49	38.0±1.2		18.4±1.5		39.5±1.4		18.8±1.5			49	28.7±0.6		8.88±0.7		27.3±0.6	*	10.3±0.7	*
	56	35.8±1.2		15.4±1.8	****	35.5±1.3		19.6±1.7	****		56	29.2±0.6		8.69±0.8	****	27.7±0.6		10.1±0.8	****		56	35.8±1.2		15.4±1.8		35.5±1.3		19.6±1.7	0.1		56	29.2±0.6		8.69±0.8		27.7±0.6	*	10.1±0.8	*
		Ejection fraction (%)										Cardiac output (µL/min)										Ejection fraction (%)										Cardiac output (µL/min)
	Days	WT_Sham		WT_TAC		cKO_Sham		cKO_TAC			Days	WT_Sham		WT_TAC		cKO_Sham		cKO_TAC			Days	WT_Sham		WT_TAC		cKO_Sham		cKO_TAC			Days	WT_Sham		WT_TAC		cKO_Sham		cKO_TAC
	-1	60.0±1.0		54.6±1.2	**	57.7±1.0		57.4±1.2			-1	19.5±0.6		18.8±0.7		20.6±0.6		19.9±0.7			-1	60.0±1.0		54.6±1.2		57.7±1.0	*	57.4±1.2	*		-1	19.5±0.6		18.8±0.7		20.6±0.6	*	19.9±0.7	*
	7	55.7±1.4		41.2±1.4	****	53.5±1.4		44.0±1.5	****		7	17.2±0.9		13.0±0.9	**	18.3±0.9		14.2±0.9	**		7	55.7±1.4		41.2±1.4		53.5±1.4	*	44.0±1.5	*		7	17.2±0.9		13.0±0.9		18.3±0.9	*	14.2±0.9	*
	14	55.2±1.0		33.0±1.2	****	52.9±1.0		35.8±1.2	****		14	19.2±0.6		14.7±0.7	****	20.4±0.6		15.8±0.7	****		14	55.2±1.0		33.0±1.2		52.9±1.0	*	35.8±1.2	*		14	19.2±0.6		14.7±0.7		20.4±0.6	*	15.8±0.7	*
	21	54.8±1.4		30.5±1.4	****	52.5±1.4		33.3±1.5	****		21	17.7±0.9		12.0±0.9	****	18.8±0.9		13.2±0.9	****		21	54.8±1.4		30.5±1.4		52.5±1.4	*	33.3±1.5	*		21	17.7±0.9		12.0±0.9		18.8±0.9	*	13.2±0.9	*
	28	56.9±1.0		27.8±1.2	****	54.6±1.0		30.6±1.2	****		28	21.0±0.6		11.0±0.7	****	22.2±0.6		12.1±0.7	****		28	56.9±1.0		27.8±1.2		54.6±1.0	*	30.6±1.2	*		28	21.0±0.6		11.0±0.7		22.2±0.6	*	12.1±0.7	*
	35	55.5±1.0		24.1±1.2	****	53.3±1.1		26.9±1.2	****		35	18.5±0.6		10.9±0.7	****	19.6±0.7		12.1±0.7	****		35	55.5±1.0		24.1±1.2		53.3±1.1	*	26.9±1.2	*		35	18.5±0.6		10.9±0.7		19.6±0.7	*	12.1±0.7	*
	42	56.2±1.0		21.5±1.2	****	53.9±1.0		24.3±1.2	****		42	19.3±0.6		9.67±0.7	****	20.4±0.6		10.8±0.7	****		42	56.2±1.0		21.5±1.2		53.9±1.0	*	24.3±1.2	*		42	19.3±0.6		9.67±0.7		20.4±0.6	*	10.8±0.7	*
	49	55.8±1.0		19.7±1.2	****	53.5±1.1		22.5±1.2	****		49	20.1±0.6		8.57±0.7	****	21.3±0.6		9.71±0.7	****		49	55.8±1.0		19.7±1.2		53.5±1.1	*	22.5±1.2	*		49	20.1±0.6		8.57±0.7		21.3±0.6	*	9.71±0.7	*
	56	56.6±1.0		19.3±1.4	****	54.3±1.0		22.1±1.4	****		56	20.2±0.6		8.69±0.8	****	21.3±0.6		9.83±0.8	****		56	56.6±1.0		19.3±1.4		54.3±1.0	*	22.1±1.4	*		56	20.2±0.6		8.69±0.8		21.3±0.6	*	9.83±0.8	*
		LVAWth;s (mm)										LVPWth;s (mm)										LVAWth;s (mm)										LVPWth;s (mm)
	Days	WT_Sham		WT_TAC		cKO_Sham		cKO_TAC			Days	WT_Sham		WT_TAC		cKO_Sham		cKO_TAC			Days	WT_Sham		WT_TAC		cKO_Sham		cKO_TAC			Days	WT_Sham		WT_TAC		cKO_Sham		cKO_TAC
	-1	1.1±0.02		1.1±0.02		1.2±0.02		1.1±0.02			-1	0.97±0.02		0.93±0.03		0.94±0.02		0.89±0.03			-1	1.1±0.02		1.1±0.02		1.2±0.02		1.1±0.02			-1	0.97±0.02		0.93±0.03		0.94±0.02	*	0.89±0.03	*
	7	1.1±0.03		1.1±0.03		1.1±0.03		1.1±0.03			7	1.02±0.03		1.15±0.03	*	0.99±0.03		1.11±0.03	*		7	1.1±0.03		1.1±0.03		1.1±0.03		1.1±0.03			7	1.02±0.03		1.15±0.03		0.99±0.03	*	1.11±0.03	*
	14	1.1±0.02		1.0±0.02		1.1±0.02		1.1±0.02			14	1.02±0.02		1.03±0.03		0.99±0.02		0.99±0.03			14	1.1±0.02		1.0±0.02		1.1±0.02		1.1±0.02			14	1.02±0.02		1.03±0.03		0.99±0.02	*	0.99±0.03	*
	21	1.2±0.03		1.2±0.03		1.2±0.03		1.2±0.03			21	0.97±0.03		1.01±0.03		0.94±0.03		0.98±0.03			21	1.2±0.03		1.2±0.03		1.2±0.03		1.2±0.03			21	0.97±0.03		1.01±0.03		0.94±0.03	*	0.98±0.03	*
	28	1.2±0.02		1.1±0.02		1.2±0.02		1.2±0.02			28	0.99±0.02		1.08±0.03	*	0.96±0.02		1.04±0.03	*		28	1.2±0.02		1.1±0.02		1.2±0.02		1.2±0.02			28	0.99±0.02		1.08±0.03		0.96±0.02	*	1.04±0.03	*
	35	1.2±0.02		1.1±0.02		1.2±0.02		1.2±0.02			35	0.97±0.02		1.11±0.03	**	0.94±0.02		1.07±0.03	**		35	1.2±0.02		1.1±0.02		1.2±0.02		1.2±0.02			35	0.97±0.02		1.11±0.03		0.94±0.02	*	1.07±0.03	*
	42	1.2±0.02		1.1±0.02		1.2±0.02		1.2±0.02			42	1.02±0.02		1.15±0.03	**	0.99±0.02		1.12±0.03	**		42	1.2±0.02		1.1±0.02		1.2±0.02		1.2±0.02			42	1.02±0.02		1.15±0.03		0.99±0.02	*	1.12±0.03	*
	49	1.2±0.02		1.2±0.02		1.2±0.02		1.2±0.02			49	1.02±0.02		1.04±0.03		0.98±0.02		1.00±0.03			49	1.2±0.02		1.2±0.02		1.2±0.02		1.2±0.02			49	1.02±0.02		1.04±0.03		0.98±0.02	*	1.00±0.03	*
	56	1.2±0.02		1.2±0.02		1.2±0.02		1.2±0.02			56	1.03±0.02		1.15±0.03	**	0.99±0.02		1.12±0.03	**		56	1.2±0.02		1.2±0.02		1.2±0.02		1.2±0.02			56	1.03±0.02		1.15±0.03		0.99±0.02	*	1.12±0.03	*
		LVAWth;d (mm)										LVPWth;d (mm)										LVAWth;d (mm)										LVPWth;d (mm)
	Days	WT_Sham		WT_TAC		cKO_Sham		cKO_TAC			Days	WT_Sham		WT_TAC		cKO_Sham		cKO_TAC			Days	WT_Sham		WT_TAC		cKO_Sham		cKO_TAC			Days	WT_Sham		WT_TAC		cKO_Sham		cKO_TAC
	-1	0.7±0.02		0.6±0.03	*	0.7±0.02		0.6±0.03	*		-1	0.65±0.02		0.66±0.02		0.63±0.02		0.65±0.02			-1	0.7±0.02		0.6±0.03		0.7±0.02		0.6±0.03			-1	0.65±0.02		0.66±0.02		0.63±0.02		0.65±0.02
	7	0.7±0.03		0.7±0.03		0.7±0.03		0.7±0.03			7	0.67±0.03		0.88±0.03	****	0.66±0.03		0.86±0.03	****		7	0.7±0.03		0.7±0.03		0.7±0.03		0.7±0.03			7	0.67±0.03		0.88±0.03		0.66±0.03		0.86±0.03
	14	0.6±0.02		0.7±0.03	*	0.6±0.02		0.7±0.03	*		14	0.71±0.02		0.78±0.02	0.058	0.69±0.02		0.76±0.02	0.058		14	0.6±0.02		0.7±0.03		0.6±0.02		0.7±0.03			14	0.71±0.02		0.78±0.02		0.69±0.02		0.76±0.02
	21	0.8±0.03		0.9±0.03	*	0.8±0.03		0.9±0.03	*		21	0.68±0.03		0.79±0.03	*	0.66±0.03		0.77±0.03	*		21	0.8±0.03		0.9±0.03		0.8±0.03		0.9±0.03			21	0.68±0.03		0.79±0.03		0.66±0.03		0.77±0.03
	28	0.7±0.02		0.9±0.03	****	0.7±0.02		0.9±0.03	****		28	0.70±0.02		0.88±0.02	****	0.69±0.02		0.87±0.02	****		28	0.7±0.02		0.9±0.03		0.7±0.02		0.9±0.03			28	0.70±0.02		0.88±0.02		0.69±0.02		0.87±0.02
	35	0.7±0.02		0.9±0.03	****	0.7±0.02		0.9±0.03	****		35	0.68±0.02		0.93±0.02	****	0.66±0.02		0.91±0.02	****		35	0.7±0.02		0.9±0.03		0.7±0.02		0.9±0.03			35	0.68±0.02		0.93±0.02		0.66±0.02		0.91±0.02
	42	0.7±0.02		0.9±0.03	****	0.7±0.02		0.9±0.03	****		42	0.68±0.02		0.96±0.02	****	0.66±0.02		0.94±0.02	****		42	0.7±0.02		0.9±0.03		0.7±0.02		0.9±0.03			42	0.68±0.02		0.96±0.02		0.66±0.02		0.94±0.02
	49	0.7±0.02		1.0±0.03	****	0.7±0.02		1.0±0.03	****		49	0.67±0.02		0.91±0.02	****	0.65±0.02		0.89±0.02	****		49	0.7±0.02		1.0±0.03		0.7±0.02		1.0±0.03			49	0.67±0.02		0.91±0.02		0.65±0.02		0.89±0.02
	56	0.7±0.02		1.0±0.03	****	0.7±0.02		1.0±0.03	****		56	0.72±0.02		0.98±0.03	****	0.71±0.02		0.96±0.03	****		56	0.7±0.02		1.0±0.03		0.7±0.02		1.0±0.03			56	0.72±0.02		0.98±0.03		0.71±0.02		0.96±0.03
